# Supplementary material for: Liquid-crystalline TADF materials based on substituted carbazoles and terephthalonitrile
Source: Royal Society of Chemistry journal article supplement (doi:10.1039/d1tc00443c), 2021-01-01
Supplement: d1tc00443c1.pdf [file d1tc00443c1.pdf]

# **Liquid-crystalline TADF materials based on Substituted Carbazoles and Terephthalonitrile**

**Alfiya F. Suleymanova, Marsel Z. Shafikov, Adrian C. Whitwood**

**Rafał Czerwieniec\* and Duncan W. Bruce\***

## **Supplementary Information**

### **Table of Contents**

|                                 |     |
|---------------------------------|-----|
| General information             | S2  |
| Synthetic procedures            | S3  |
| X-ray Crystallographic Analyses | S11 |
| Liquid Crystal Data             | S12 |
| Photophysical Data              | S13 |
| Theoretical Data                | S14 |

## General information

NMR spectra were recorded on a JEOL ECX spectrometer at 298 K.  $^1\text{H}$  NMR (400 MHz) chemical shifts are referenced to residual  $\text{CHCl}_3$  ( $\delta$  7.26) in  $\text{CDCl}_3$ , DCM ( $\delta$  5.32) in methylene chloride- $\text{d}_2$  and DMSO in  $\text{DMSO-d}_6$ .  $^{13}\text{C}$  NMR (100 MHz) chemical shifts are reported relative to  $\text{CDCl}_3$  ( $\delta$  77.3),  $\text{DCM-d}_2$  ( $\delta$  54.00) and  $\text{DMSO-d}_6$  ( $\delta$  39.52).  $^{11}\text{B}$  NMR (128 MHz) and  $^{19}\text{F}$  NMR (376 MHz) chemical shifts are uncorrected. Elemental analysis was carried out on an Exeter Analytical Inc. CE-440 analyser. Accurate mass measurement analyses were conducted using matrix-assisted laser desorption/ionization (MALDI). Optical textures were recorded using an Olympus BX50 polarising microscope equipped with a Linkam scientific LTS350 heating stage, Linkam LNP2 cooling pump and Linkam TMS92 controller. DSC was performed on a Mettler DSC822e fitted with an autosampler operating with Mettler Star-E software and calibrated before use against an indium standard (onset =  $156.55 \pm 0.2^\circ\text{C}$ ,  $\Delta H = 28.45 \pm 0.40 \text{ J g}^{-1}$ ), with all runs performed under an atmosphere of dry nitrogen.

All reagents were purchased from commercial sources and used as received. Solvents were purified with drying cartridges through a solvent delivery system. Reactions were monitored by TLC using silica gel ( $\text{F}_{254}$  plates, 60 Å porosity). TLC analysis was visualized using UV light. The products were purified by chromatography on silica gel (60 Å porosity, 35-75  $\mu\text{m}$ ) or aluminium oxide (60 Å porosity, 50-200  $\mu\text{m}$ , neutral).

The UV-Vis absorption spectra were measured with a Varian Cary 300 double beam spectrometer. The emission and excitation spectra were measured with a Horiba Jobin Yvon Fluorolog-3 steady-state fluorescence spectrometer. The emission decay times were measured with a PicoBright PB-375 pulsed diode laser ( $\lambda_{\text{exc}} = 378 \text{ nm}$ , pulse width 100 ps) used as the excitation source, and the PL signal was detected with a cooled photomultiplier attached to a FAST ComTec multichannel scalar PCI card with a time resolution of 250 ps. The PL quantum yield was determined with a Hamamatsu C9920-02 system equipped with a Spectralon® integrating sphere.

All calculations were carried out with the Gaussian 09 package<sup>1</sup> utilising the DFT approach with the M11L functional<sup>2</sup> and the def2-SVP basis set<sup>3</sup>. Geometry optimisations were conducted with 'tight' criteria.

## Synthetic procedures

### 4-Dodecyloxybromobenzene

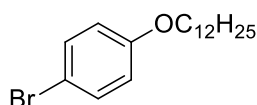

4-Bromophenol (10 g, 57.8 mmol) was dissolved in dry dimethylformamide (200 mL) and degassed by flushing nitrogen through the solution for 30 min.

Potassium carbonate (16 g, 115.6 mmol) was added and the suspension was stirred for another 30 min at room temperature under a nitrogen atmosphere. After addition of 1-bromododecane (23.6 mL, 98.26 mmol), the reaction mixture was stirred at 80 °C overnight. After cooling to room temperature, the reaction mixture was poured into water (500 mL), and then extracted with hexane (2×200 mL). The combined organic layers were washed with water, and dried over anhydrous MgSO<sub>4</sub>. Solvents were evaporated. Yield: 95% (18.88 g). <sup>1</sup>H NMR (400 MHz, CDCl<sub>3</sub>): δ 7.35 (2H, d, *J* = 8.8 Hz, Ph), 6.76 (2H, d, *J* = 8.8 Hz, Ph), 3.90 (2H, t, *J* = 6.7 Hz, OCH<sub>2</sub>), 1.76 (2H, m, CH<sub>2</sub>), 1.43 (2H, m, CH<sub>2</sub>), 1.26 (16H, m, alkyl), 0.88 (3H, t, *J* = 6.7 Hz, CH<sub>3</sub>).

### 2-(4-Dodecyloxyphenyl)-4,4,5,5-tetramethyl[1,3,2]dioxaborolane

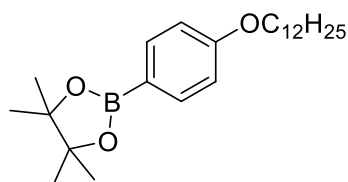

A flask charged with palladium catalyst Pd(dppf)Cl<sub>2</sub> (300 mg, 0.4 mmol), potassium acetate (6.1 g, 62.4 mmol), and bis(pinacolato)diboron (5.8 g, 23 mmol) was flushed with nitrogen.

Anhydrous dimethyl sulfoxide (30 mL) and 4-dodecyloxybromobenzene (7.1 g, 20.8 mmol) were then added. After being stirred at 90 °C overnight under a nitrogen atmosphere, the mixture was extracted with toluene (2×100 mL), washed with water and dried over anhydrous MgSO<sub>4</sub>. The product was purified by column chromatography (silica gel, dichloromethane/petroleum ether (from 1/1 to 1/0)). Yield: 52% (4.2 g). <sup>1</sup>H NMR (400 MHz, CDCl<sub>3</sub>): δ 7.73 (2H, d, *J* = 8.7 Hz, Ph), 6.88 (2H, d, *J* = 8.7 Hz, Ph), 3.97 (2H, t, *J* = 6.6 Hz, OCH<sub>2</sub>), 1.77 (2H, m, CH<sub>2</sub>), 1.44 (2H, m, CH<sub>2</sub>), 1.33 (12H, s, CH<sub>3</sub>), 1.26 (16H, m, CH<sub>2</sub>), 0.88 (3H, t, *J* = 6.8 Hz, CH<sub>3</sub>). <sup>11</sup>B NMR (128 MHz, CDCl<sub>3</sub>): δ 29.85.

### 3,4-Dihydroxybromobenzene

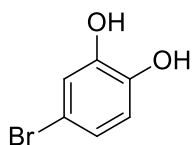

3,4-Dimethoxybromobenzene (5 mL, 39.2 mmol) was dissolved in dry dichloromethane (200 mL). Nitrogen was bubbled for 30 min to remove the oxygen. After cooling down to -78 °C for 30 min in dry ice/acetone bath, BBr<sub>3</sub> (1 M solution in heptane, 102 mL, 102 mmol) was added dropwise and the suspension was stirred at -78 °C for 30 min. Then the mixture was slowly warmed to 40 °C and stirred overnight. Saturated NH<sub>4</sub>Cl aqueous solution was added dropwise at 0 °C to quench the reaction. The mixture was extracted with ethyl acetate (2×150 mL). The organic phase was collected, dried over anhydrous MgSO<sub>4</sub> and evaporated. The product was purified by flash chromatography (silica gel, petroleum ether/ethyl acetate, 2/1). Yield: 98% (7.2 g). <sup>1</sup>H NMR (400 MHz, CDCl<sub>3</sub>): δ 7.02 (1H, d, *J* = 2.3 Hz, Ph), 6.91 (1H, dd, *J* = 8.6, 2.3 Hz, Ph), 6.74 (1H, d, *J* = 8.6 Hz, Ph), 6.00 (1H, s, OH), 5.79 (1H, s, OH).

### 3,4-Didodecyloxybromobenzene

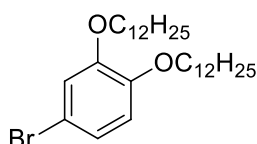

3,4-Dihydroxybromobenzene (3.1 g, 16.4 mmol) was dissolved in dry dimethylformamide (60 mL) and degassed by flushing nitrogen through the solution for 30 min. Potassium carbonate (9 g, 65.6 mmol) was added and the suspension was stirred for another 30 min at room temperature under a nitrogen atmosphere. After addition of 1-bromododecane (12.6 mL, 52.5 mmol), the reaction mixture was stirred overnight at 80 °C. After cooling to room temperature, the reaction mixture was poured into water (500 mL), and then extracted with hexane (3×100 mL). The combined organic layers were washed with water and dried over anhydrous MgSO<sub>4</sub>. After evaporation of solvents, the product was purified by column chromatography (silica gel, hexane/ethyl acetate, 4/1), and dried under vacuum to give a product as a white solid. Yield: 96% (8.3 g). <sup>1</sup>H NMR (400 MHz, CDCl<sub>3</sub>): δ 6.98 (2H, m, Ph), 6.73 (1H, d, *J* = 9.1 Hz, Ph), 3.95 (4H, m, OCH<sub>2</sub>), 1.80 (4H, m, CH<sub>2</sub>), 1.44 (4H, m, CH<sub>2</sub>), 1.26 (32H, m, alkyl), 0.88 (6H, t, *J* = 6.8 Hz, CH<sub>3</sub>).

### 2-(3,4-Didodecyloxyphenyl)-4,4,5,5-tetramethyl[1,3,2]dioxaborolane

A flask charged with palladium catalyst Pd(dppf)Cl<sub>2</sub> (155 mg, 0.2 mmol), potassium acetate (3.1 g, 32 mmol), and bis(pinacolato)diboron (3 g, 11.8 mmol) was flushed with nitrogen. Anhydrous dimethyl sulfoxide (50 mL) and 3,4-didodecyloxybromobenzene (5.6 g, 10.6 mmol) were then added. After being stirred at 90 °C overnight under a nitrogen atmosphere, the mixture was extracted with toluene (2×100 mL), washed with water and dried over anhydrous MgSO<sub>4</sub>. The

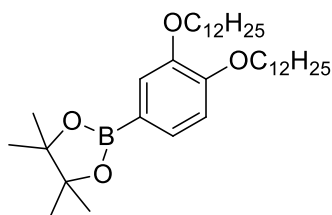

product was purified by column chromatography (silica gel, dichloromethane/petroleum ether, 1/1). Yield: 61% (3.7 g).  $^1\text{H}$  NMR (400 MHz,  $\text{CDCl}_3$ ):  $\delta$  7.38 (1H, dd,  $J = 7.8, 1.6$  Hz, Ph), 7.29 (1H, d,  $J = 1.6$  Hz, Ph), 6.87 (1H, d,  $J = 7.8$  Hz, Ph), 4.02 (4H, m,  $\text{OCH}_2$ ), 1.81 (4H, m,  $\text{CH}_2$ ), 1.46 (4H, m,  $\text{CH}_2$ ), 1.33 (12H, s,  $\text{CH}_3$ ), 1.26 (32H, m, alkyl), 0.88 (6H, t,  $J = 6.8$  Hz,  $\text{CH}_3$ ).  $^{11}\text{B}$  NMR (128 MHz,  $\text{CDCl}_3$ ):  $\delta$  30.12.

### 3,6-Di-(4-dodecyloxyphenyl)-9H-carbazole

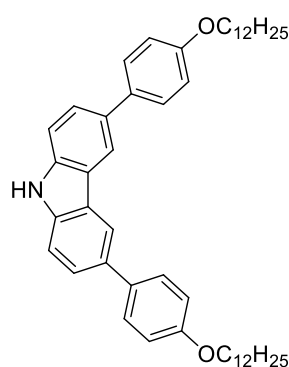

A solution of 3,6-dibromocarbazole (1.4 g, 4.3 mmol) and 2-(4-dodecyloxyphenyl)-4,4,5,5-tetramethyl[1,3,2]dioxaborolane (4.2 g, 10.8 mmol) in a mixture of toluene (40 mL), ethanol (20 mL) and  $\text{K}_2\text{CO}_3$  (5.95 g, 43 mmol) solution in water (10 mL) was degassed by argon bubbling for 30 min.  $\text{Pd}(\text{OAc})_2$  (0.19 g, 0.86 mmol) and S-Phos (0.7 g, 1.7 mmol) were added and the mixture was immediately transferred to a pre-heated oil bath and refluxed overnight. After hydrolysis (30 mL of water), the mixture

was extracted with ethyl acetate ( $2 \times 50$  mL), washed with brine (50 mL), dried over  $\text{MgSO}_4$ , then filtered. The solvents were removed under reduced pressure and the crude material was purified by flash chromatography (deactivated alumina, petroleum ether/ethyl acetate, 5/1). Yield: 39% (1.16 g).  $^1\text{H}$  NMR (400 MHz,  $\text{CD}_2\text{Cl}_2$ ):  $\delta$  8.29 (2H, d,  $J = 1.8$  Hz, Cz), 8.24 (1H, broad, NH), 7.65 (2H, dd,  $J = 8.4, 1.8$  Hz, Cz), 7.64 (4H, d,  $J = 8.8$  Hz, Ph), 7.51 (2H, d,  $J = 8.4$  Hz, Cz), 7.0 (4H, d,  $J = 8.8$  Hz, Ph), 4.02 (4H, t,  $J = 6.6$  Hz,  $\text{OCH}_2$ ), 1.81 (4H, m,  $\text{CH}_2$ ), 1.49 (4H, m,  $\text{CH}_2$ ), 1.28 (32H, m, alkyl), 0.89 (6H, t,  $J = 6.8$  Hz,  $\text{CH}_3$ ).  $^{13}\text{C}$  NMR (100 MHz,  $\text{CD}_2\text{Cl}_2$ ):  $\delta$  158.9, 139.7, 134.8, 133.2, 128.6, 125.7, 124.4, 118.7, 115.3, 111.5, 38.7, 32.5, 30.2, 30.2, 30.2, 30.0, 29.9, 29.9, 26.6, 23.3, 14.5.

### 3,6-Di-(3,4-didodecyloxyphenyl)-9H-carbazole

A solution of 3,6-dibromocarbazole (0.84 g, 2.6 mmol) and 2-(3,4-didodecyloxyphenyl)-4,4,5,5-tetramethyl[1,3,2]-dioxaborolane (3.7 g, 6.4 mmol) in a mixture of toluene (20 mL), ethanol (10 mL) and  $\text{K}_2\text{CO}_3$  (3.57 g, 26 mmol) solution in water (5 mL) was degassed by argon bubbling for 30 min.  $\text{Pd}(\text{OAc})_2$  (90 mg, 0.4 mmol) and S-Phos (325 mg, 0.8 mmol) were added and the mixture was immediately transferred to a pre-heated oil bath and refluxed for 48 h. After hydrolysis (150 mL of water), the mixture was extracted with ethyl acetate ( $2 \times 200$  mL), washed with brine (200 mL), dried over  $\text{MgSO}_4$ , then filtered. The solvents were removed under reduced pressure and the crude

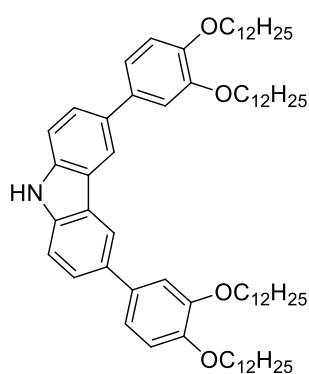

material was purified by recrystallisation from ethanol. Yield: 55% (1.5 g).

$^1\text{H}$  NMR (400 MHz,  $\text{CD}_2\text{Cl}_2$ ):  $\delta$  8.30 (2H, d,  $J$  = 1.8 Hz, Cz), 8.27 (1H, broad, NH), 7.66 (2H, dd,  $J$  = 8.4, 1.8 Hz, Cz), 7.51 (2H, d,  $J$  = 8.4 Hz, Cz), 7.26 (2H, d,  $J$  = 2.2 Hz, Ph), 7.23 (2H, dd,  $J$  = 8.3, 2.2 Hz, Ph), 6.99 (2H, d,  $J$  = 8.3 Hz, Ph), 4.10 (4H, t,  $J$  = 6.6 Hz,  $\text{OCH}_2$ ), 4.03 (4H, t,  $J$  = 6.6 Hz,  $\text{OCH}_2$ ), 1.83 (8H, m,  $\text{CH}_2$ ), 1.50 (8H, m,  $\text{CH}_2$ ), 1.28 (64H, m, alkyl), 0.88 (6H, t,  $J$  = 6.8 Hz,  $\text{CH}_3$ ), 0.87 (6H, t,  $J$  = 6.8 Hz,  $\text{CH}_3$ ).  $^{13}\text{C}$  NMR (100 MHz,  $\text{CD}_2\text{Cl}_2$ ):  $\delta$  150.0, 148.9,

139.8, 135.6, 133.4, 125.8, 124.4, 120.0, 118.8, 114.9, 113.8, 111.5, 70.0, 70.0, 32.5, 30.3, 30.2, 30.0, 30.0, 29.9, 26.7, 23.3, 14.4.

### 3,6-Di-(4-methoxyphenyl)-9H-carbazole

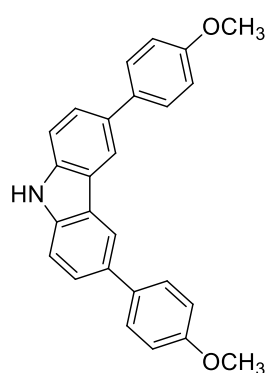

A solution of 3,6-dibromocarbazole (2 g, 6.15 mmol), 4-methoxyphenylboronic acid (2.3 g, 15.4 mmol) and  $\text{K}_2\text{CO}_3$  (8.5 g, 61.5 mmol) in a mixture of toluene (40 mL), ethanol (20 mL) and water (10 mL) was degassed by nitrogen bubbling for 30 min.  $\text{Pd}(\text{OAc})_2$  (140 mg, 0.62 mmol) and S-Phos (504 mg, 1.23 mmol) was added and the mixture was refluxed overnight. After hydrolysis with water (30 mL), the mixture was extracted with ethyl acetate (2  $\times$  50 mL), washed with brine (50 mL), dried over

anhydrous  $\text{MgSO}_4$ . The solvents were removed under reduced pressure and the crude material was recrystallized from methanol and washed with cold methanol. Yield: 82% (1.9 g).  $^1\text{H}$  NMR (400 MHz,  $\text{CDCl}_3$ ):  $\delta$  8.28 (2H, d,  $J$  = 1.8 Hz, Cz), 8.06 (1H, broad, NH), 7.65 (4H, d,  $J$  = 8.8 Hz, Ph), 7.64 (2H, dd,  $J$  = 8.4, 1.8 Hz, Cz), 7.46 (2H, d,  $J$  = 8.4 Hz, Cz), 7.03 (4H, d,  $J$  = 8.8 Hz, Ph), 3.88 (6H, s,  $\text{OCH}_3$ ).  $^{13}\text{C}$  NMR (100 MHz,  $\text{CDCl}_3$ ):  $\delta$  158.7, 139.2, 134.8, 132.9, 128.4, 125.4, 124.1, 118.5, 114.4, 111.0, 55.5.

### 3,6-Di-(3,4-dimethoxyphenyl)-9H-carbazole

A solution of 3,6-dibromocarbazole (2 g, 6.15 mmol), 3,4-methoxyphenylboronic acid (1.4 g, 7.7 mmol) and  $\text{K}_2\text{CO}_3$  (8.5 g, 61.5 mmol) in a mixture of toluene (40 mL), ethanol (20 mL) and water (10 mL) was degassed by nitrogen bubbling for 30 min.  $\text{Pd}(\text{OAc})_2$  (207 mg, 0.92 mmol) and S-Phos (758 mg, 1.85 mmol) was added and the mixture was refluxed for 48 h. After hydrolysis with water (50 mL), the mixture was extracted with ethyl acetate (2 $\times$ 100 mL), washed with brine (100 mL) and dried over anhydrous  $\text{MgSO}_4$ . The solvents were removed under reduced pressure, and the crude material was purified by recrystallisation from methanol and washed with cold methanol. Yield:

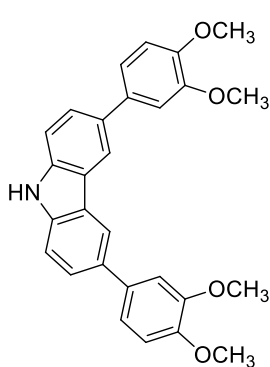

24.4 % (0.659 g).  $^1\text{H}$  NMR (400 MHz,  $\text{CDCl}_3$ ):  $\delta$  8.30 (2H, d,  $J$  = 1.8 Hz, Cz), 8.19 (1H, broad, NH), 7.66 (2H, dd,  $J$  = 8.4, 1.8 Hz, Cz), 7.50 (2H, d,  $J$  = 8.4 Hz, Cz), 7.27 (4H, m, Ph), 7.01 (2H, d,  $J$  = 8.3 Hz, Ph), 4.03 (6H, s,  $\text{OCH}_3$ ), 3.97 (6H, s,  $\text{OCH}_3$ ).  $^{13}\text{C}$  NMR (100 MHz,  $\text{CDCl}_3$ ):  $\delta$  149.3, 148.2, 139.3, 135.3, 133.2, 125.6, 124.1, 119.6, 118.7, 111.7, 111.0, 110.9, 56.2.

### 2,5-Difluoro-1,4-dicyanobenzene

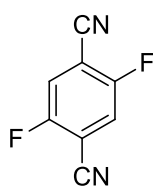

A mixture of 1,4-dibromo-2,5-difluorobenzene (1 g, 3.6 mmol), CuCN (1.65 g, 18.4 mmol) and  $\text{Pd}(\text{PPh}_3)_4$  (0.43 g, 0.37 mmol) were placed in a Schlenk tube equipped with a stirrer and the system was evacuated and filled with nitrogen in 3 cycles. After extra dry dimethylformamide (20 mL) and pyridine (0.3 mL, 3.6 mmol) were added, the mixture was heated under a nitrogen atmosphere for 36 h. The reaction was quenched using 10% aq.  $\text{NH}_3$  (20 mL), and the crude products were extracted with chloroform. The combined organic layers were washed with 10% aq.  $\text{NH}_4\text{Cl}$  (2x50 mL) and dried over anhydrous  $\text{MgSO}_4$ . The solvent was evaporated, and the residue was purified by column chromatography (silica gel, dichloromethane). Yield: 26 % (160 mg).  $^1\text{H}$  NMR (400 MHz,  $\text{CDCl}_3$ ):  $\delta$  7.55 (2H, t,  $J$  = 6.2 Hz).  $^{19}\text{F}$  NMR (376 MHz,  $\text{CDCl}_3$ ):  $\delta$  108.42 (t,  $J$  = 5.8 Hz).  $^{13}\text{C}$  NMR (100 MHz,  $\text{CDCl}_3$ ):  $\delta$  158.7 (dd,  $^1J_{\text{CF}}$  = 262 Hz,  $^4J_{\text{CF}}$  = 4.8 Hz), 121.4 (m,  $^2J_{\text{CF}}$  and  $^3J_{\text{CF}}$ ), 111.3 (CN), 107.7 (dd,  $^2J_{\text{CF}}$  = 16 Hz,  $^3J_{\text{CF}}$  = 12 Hz). MS (EI+(eiFi):  $\text{C}_8\text{H}_2\text{N}_2\text{F}_2$  164.0181, found 164.0174.

### General procedure. Di- and tetrasubstituted terephthalonitriles (3a-4b)

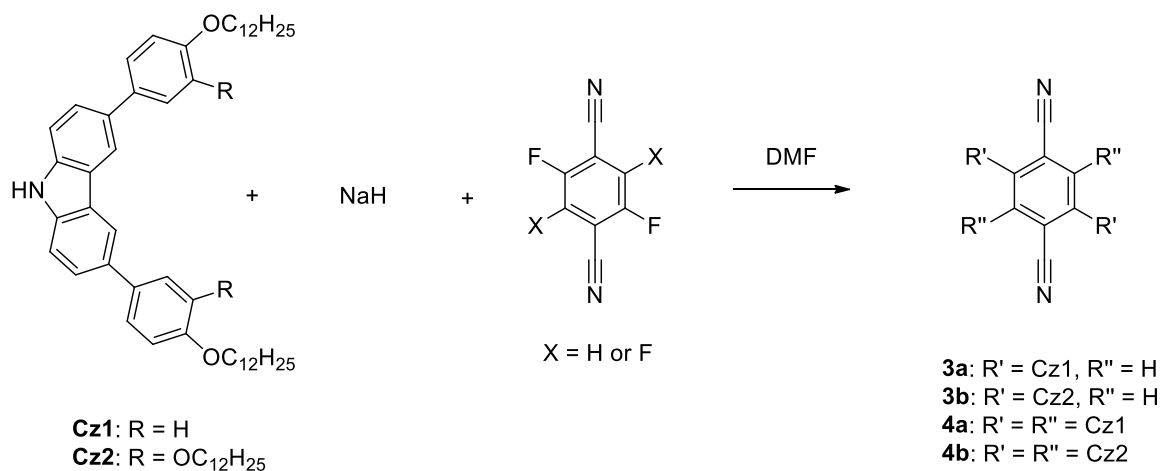

Sodium hydride (60% dispersion in oil) was washed with anhydrous hexane for 15 min. To this white powder, carbazole in extra dry dimethylformamide was added. After the liberation of  $\text{H}_2$  gas had

ceased, the yellow reaction mixture was stirred for 2 h at 70 °C. Then, terephthalonitrile in extra dry dimethylformamide was added. The reaction mixture was stirred for 4 h at 75 °C. The mixture has been cooled to ambient temperature, the precipitate was filtered off and washed with methanol. A product was purified by column chromatography.

### 2,5-Bis-(3,6-di-(4-dodecyloxyphenyl)carbazolyl)-1,4-dicyanobenzen (3a)

Purified by column chromatography (silica gel, dichloromethane/petroleum ether, 3/2). Yield: 66% (60 mg).  $^1\text{H}$  NMR (400 MHz,  $\text{CD}_2\text{Cl}_2$ ):  $\delta$  8.43 (4 H, d,  $J$  = 1.8 Hz, Cz), 8.32 (2H, s, TPN), 7.77 (4H, dd,  $J$  = 8.8 Hz, 1.8 Hz, Cz), 7.70 (8 H, d,  $J$  = 8.7 Hz, Ph), 7.48 (4H, d,  $J$  = 8.8 Hz, Cz), 7.04 (8H, d,  $J$  = 8.7 Hz, Ph), 4.04 (8H, t,  $J$  = 6.6 Hz,  $\text{OCH}_2$ ), 1.83 (8H, m,  $\text{CH}_2$ ), 1.50 (8H, m,  $\text{CH}_2$ ), 1.29 (64H, m, alkyl), 0.89 (12H, t,  $J$  = 6.8 Hz,  $\text{CH}_3$ ).  $^{13}\text{C}$  NMR (100 MHz,  $\text{CD}_2\text{Cl}_2$ ):  $\delta$  159.3, 140.5, 140.2, 135.9, 135.7, 134.0, 128.7, 126.3, 125.6, 119.3, 118.4, 115.4, 114.9, 110.6, 68.7, 32.5, 30.2, 30.2, 30.2, 30.0, 29.9, 29.9, 26.6, 23.3, 14.5. Anal. Calcd for  $\text{C}_{104}\text{H}_{130}\text{N}_4\text{O}_4 \cdot x\text{H}_2\text{O}$ : C, 82.3; H, 8.8; N, 3.7. Found: C, 82.7; H, 8.5; N, 3.6%. MS (MALDI):  $\text{C}_{104}\text{H}_{130}\text{N}_4\text{O}_4$ , 1499.0087, found 1499.0116.

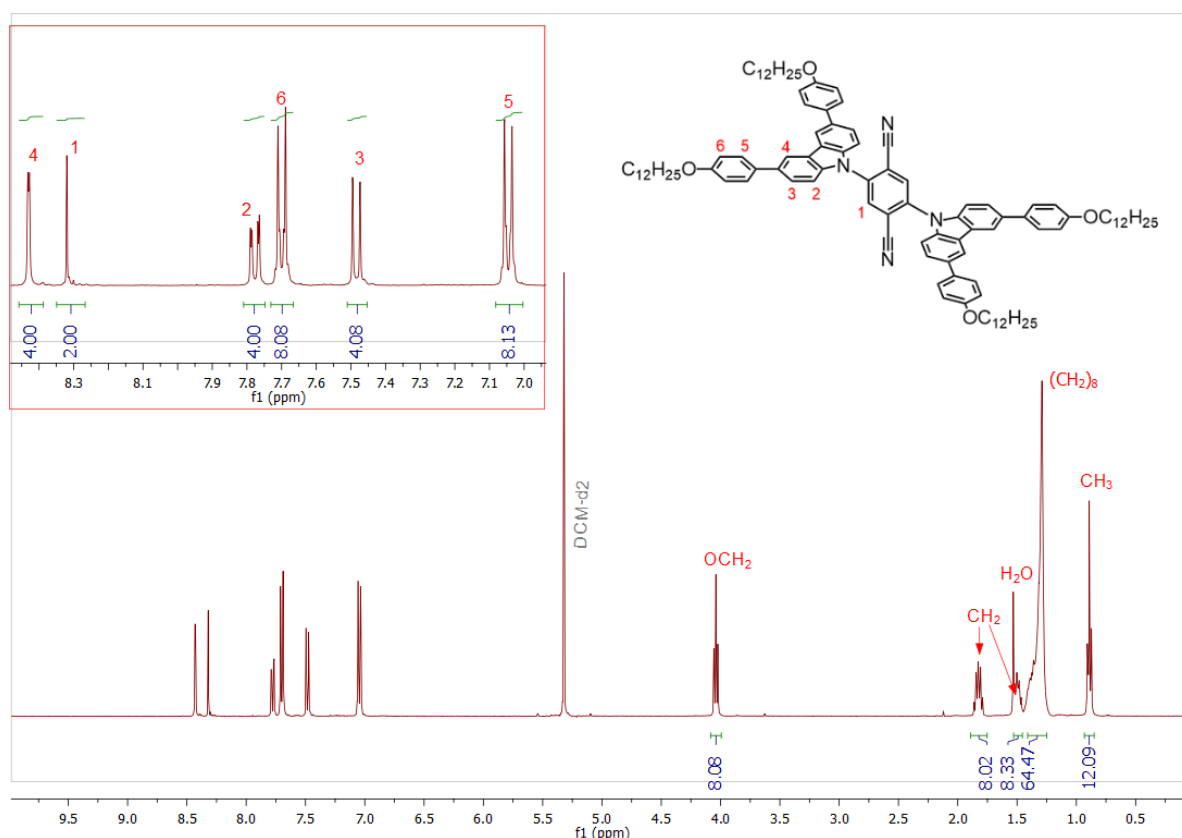



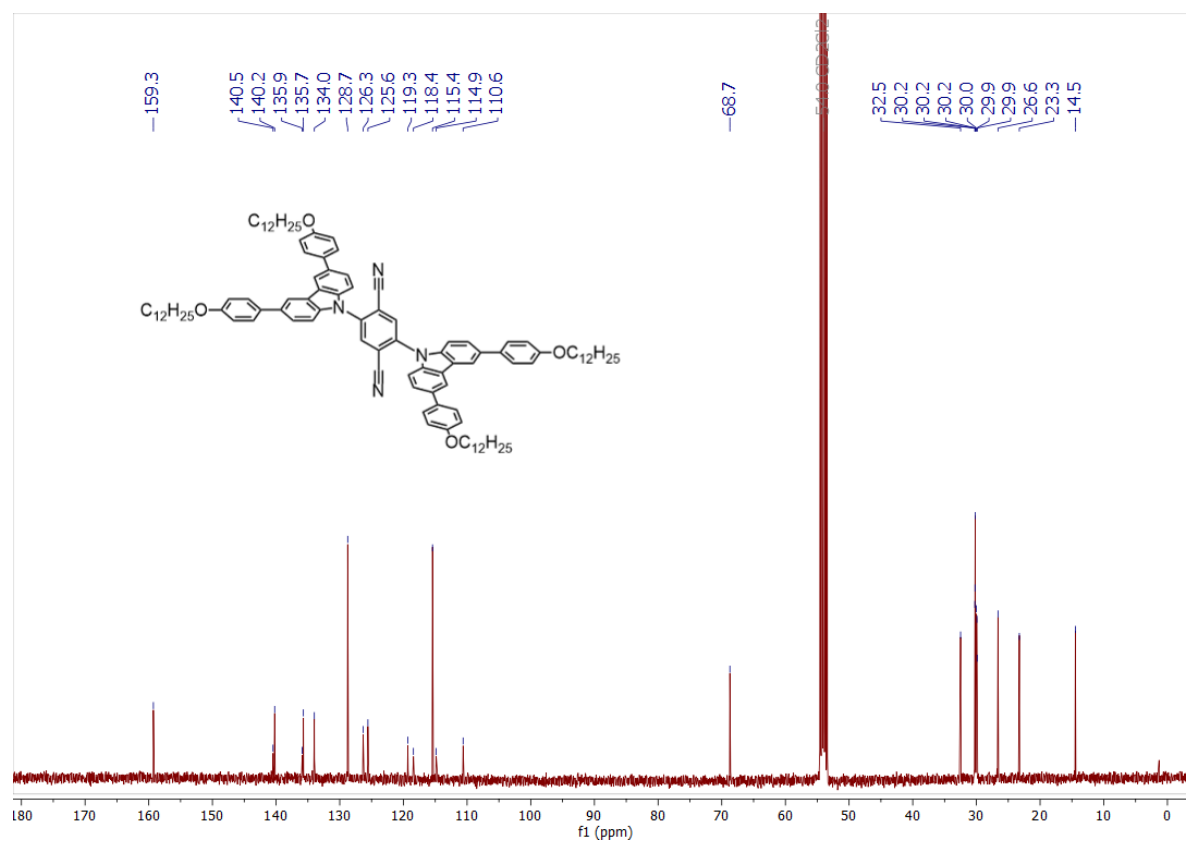

### 2,5-Bis-(3,6-di-(3,4-didodecyloxyphenyl)carbazolyl)-1,4-dicyanobenzene (3b)

Purified by flash column chromatography (silica gel, petroleum ether/ethyl acetate, 9/1). Yield: 65% (443 mg). <sup>1</sup>H NMR (400 MHz, CD<sub>2</sub>Cl<sub>2</sub>): δ 8.44 (4 H, d, *J* = 1.8 Hz, Cz), 8.34 (2H, s, TPN), 7.78 (4H, dd, *J* = 8.8 Hz, 1.8 Hz, Cz), 7.49 (4 H, d, *J* = 8.4 Hz, Cz, Ph), 7.30 (8H, m, Ph), 7.03 (4H, d, *J* = 8.0 Hz, Ph), 4.12 (8H, t, *J* = 6.6 Hz, OCH<sub>2</sub>), 4.06 (8H, t, *J* = 6.6 Hz, OCH<sub>2</sub>), 1.84 (16H, m, CH<sub>2</sub>), 1.52 (16H, m, CH<sub>2</sub>), 1.28 (128H, m, alkyl), 0.88 (24H, m, CH<sub>3</sub>). <sup>13</sup>C NMR (100 MHz, CD<sub>2</sub>Cl<sub>2</sub>): δ 150.1, 149.4, 140.5, 140.3, 136.0, 135.9, 134.7, 126.5, 125.5, 125.4, 120.2, 119.5, 118.4, 114.8, 113.9, 110.6, 70.1, 69.9, 32.5, 30.3, 30.2, 30.1, 30.05, 30.0, 29.9, 26.7, 23.3, 14. Anal. Calcd for C<sub>152</sub>H<sub>226</sub>N<sub>4</sub>O<sub>8</sub>: C, 81.6; H, 10.2; N, 2.5; found: C, 81.2; H, 10.1; N, 2.4%. MS (MALDI): C<sub>152</sub>H<sub>226</sub>N<sub>4</sub>O<sub>8</sub>, 2235.7395, found 2235.7276.

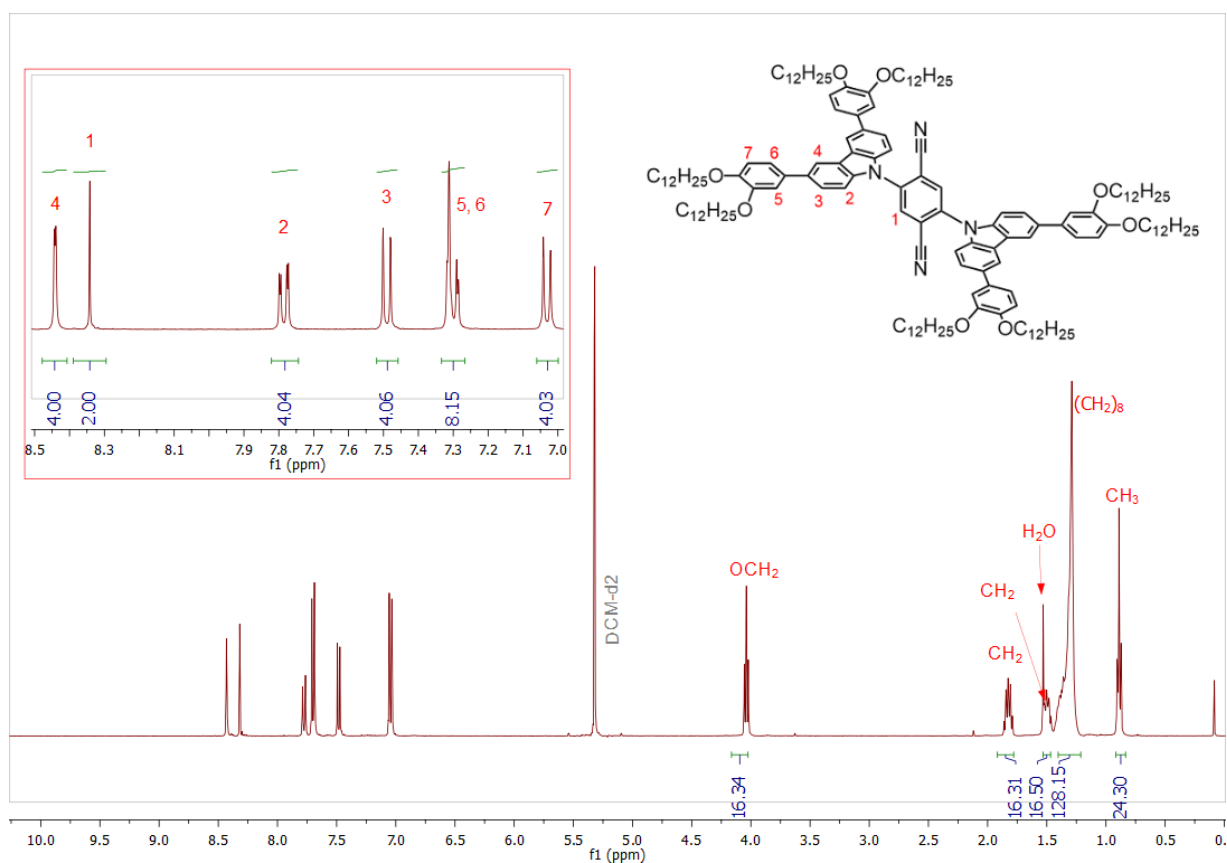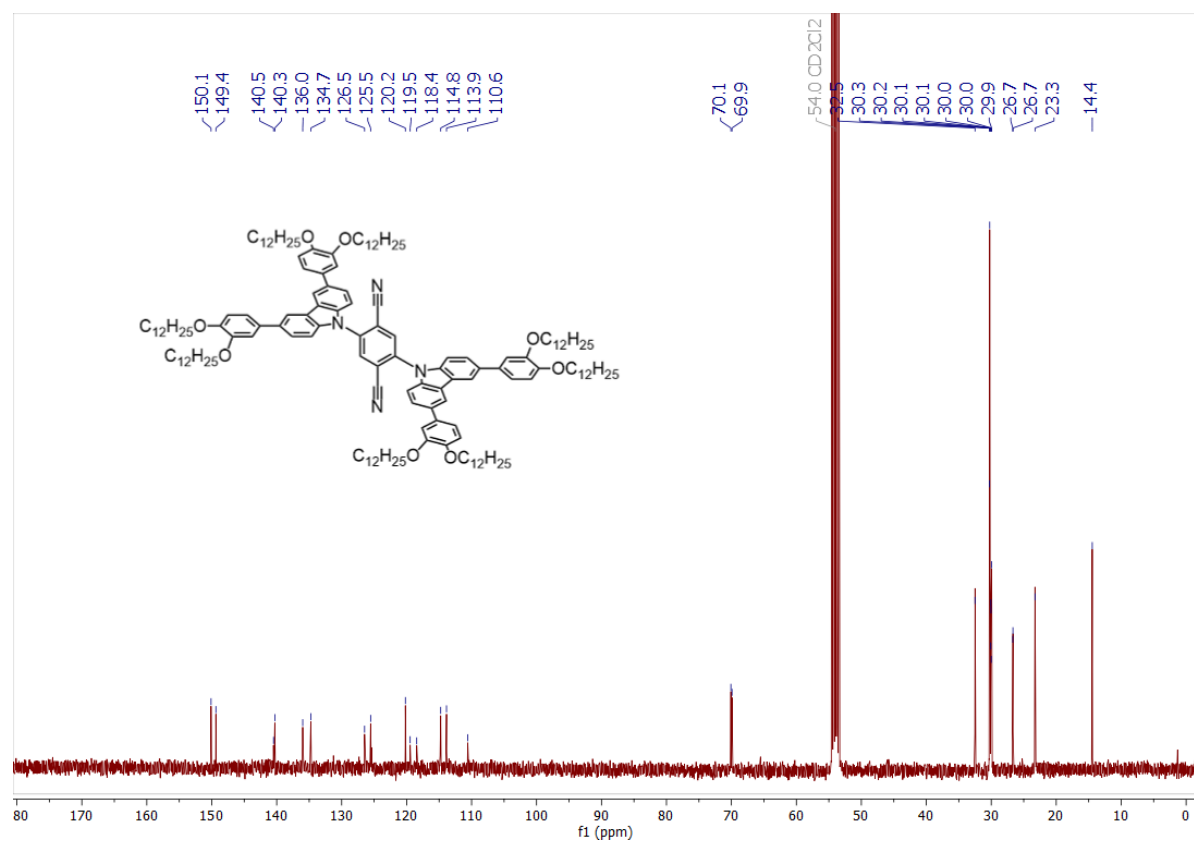

### 2,3,5,6-Tetra(3,6-di-(4-dodecyloxyphenyl)carbazolyl)-1,4-dicyanobenzen (4a)

Purified by column chromatography (silica gel, dichloromethane/petroleum ether, 1/1), and slowly crystallised from an acetonitrile/dichloromethane solution. Yield: 10% (21 mg).  $^1\text{H}$  NMR (400 MHz,  $\text{CD}_2\text{Cl}_2$ ):  $\delta$  7.93 (8 H, d,  $J$  = 1.8 Hz, Cz), 7.49 (16H, d,  $J$  = 8.8 Hz, Ph), 7.42 (8 H, dd,  $J$  = 8.4 Hz, 1.8 Hz, Cz), 7.37 (8H, d,  $J$  = 8.4 Hz, Cz), 6.95 (16H, d,  $J$  = 8.8 Hz, Ph), 4.02 (16H, t,  $J$  = 6.6 Hz,  $\text{OCH}_2$ ), 1.82 (16H, m,  $\text{CH}_2$ ), 1.50 (16H, m,  $\text{CH}_2$ ), 1.29 (128H, m, alkyl), 0.88 (24H, t,  $J$  = 6.8 Hz,  $\text{CH}_3$ ).  $^{13}\text{C}$  NMR (100 MHz,  $\text{CDCl}_3$ ):  $\delta$  158.7, 140.5, 138.6, 135.4, 133.8, 128.4, 125.6, 124.9, 118.4, 115.0, 110.6, 68.3, 32.1, 29.9, 29.8, 29.6, 29.5, 26.3, 22.9, 14.3. Anal. Calcd for  $\text{C}_{200}\text{H}_{256}\text{N}_6\text{O}_8 \cdot \text{H}_2\text{O}$ : C, 83.1; H, 9.0; N, 2.9. Found: C, 82.7; H, 8.7; N, 2.6%. MS (MALDI):  $\text{C}_{200}\text{H}_{256}\text{N}_6\text{O}_6$ , 2869.9804, found 2869.9886.

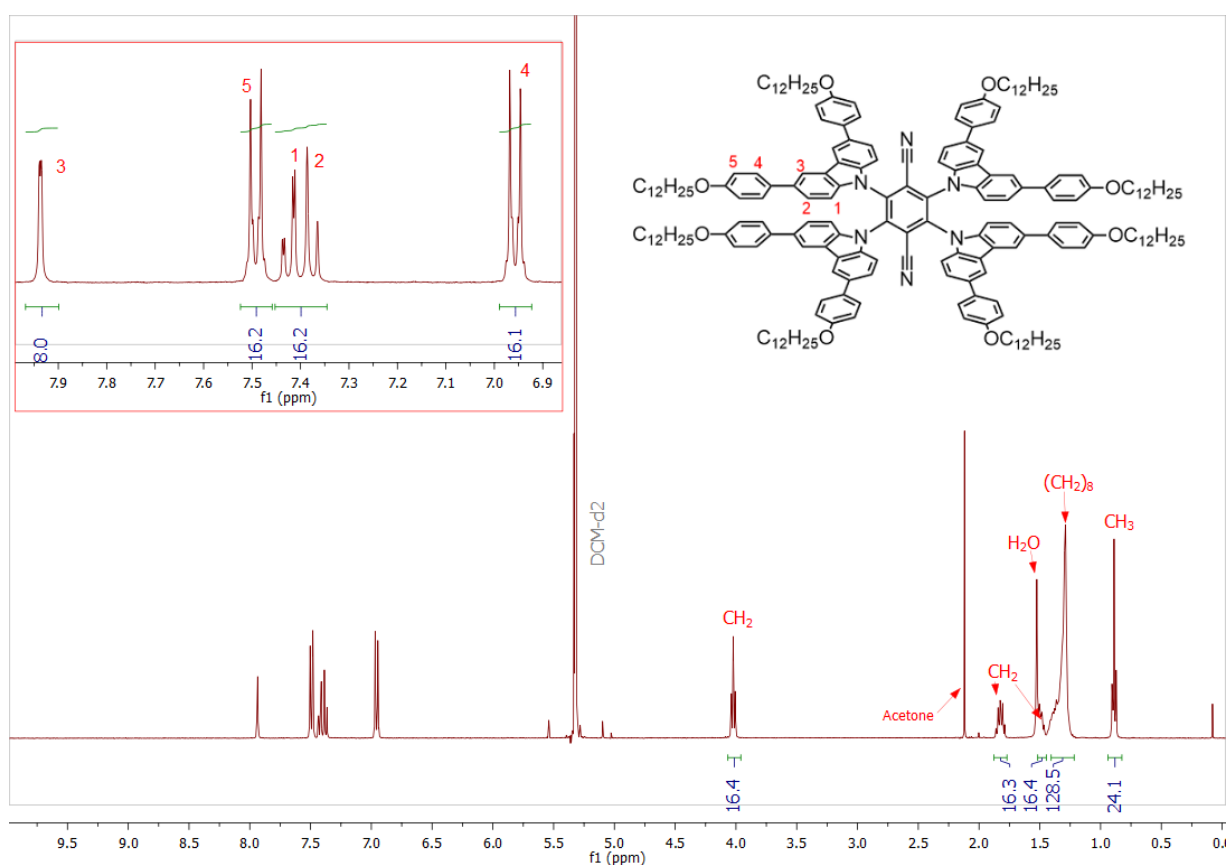

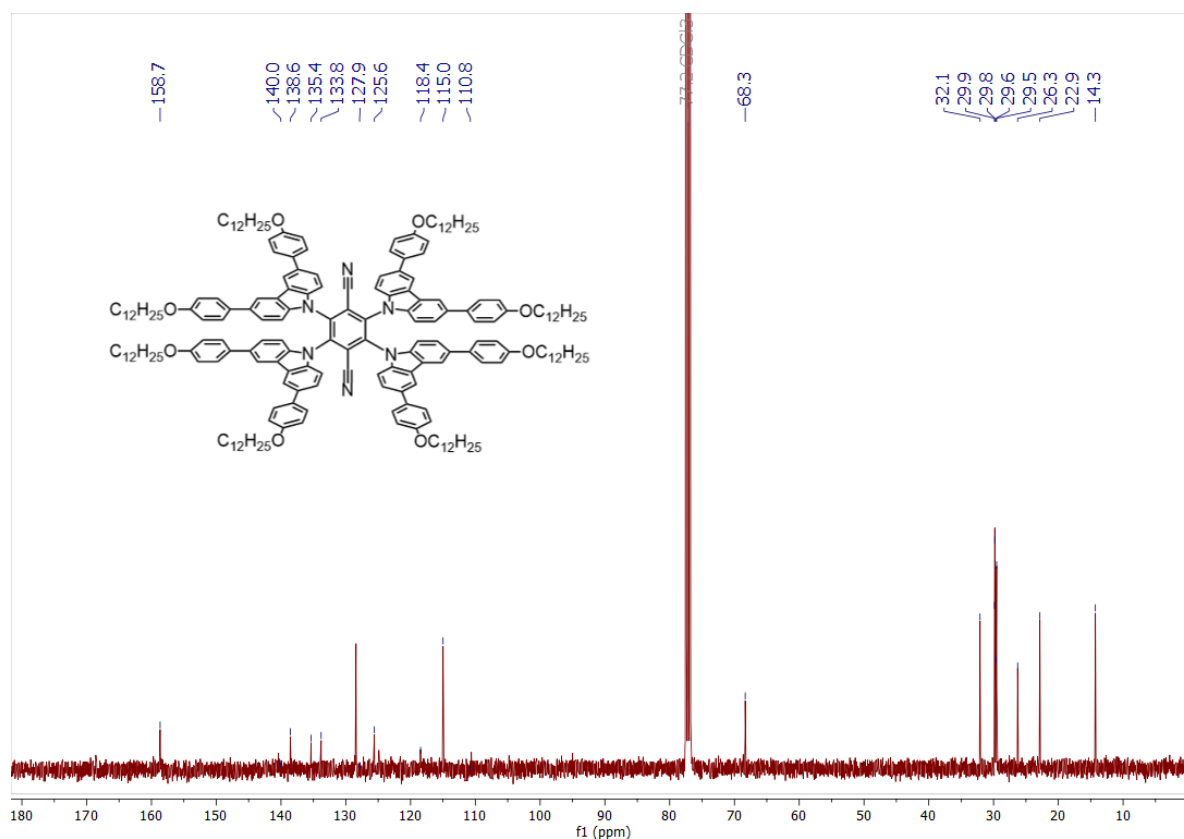

### 2,3,5,6-Tetra(3,6-di-(3,4-didodecyloxyphenyl)carbazolyl)-1,4-dicyanobenzene (**4b**)

Purified by column chromatography (silica gel, dichloromethane/petroleum ether, 1/1). Yield: 23% (60 mg).  $^1\text{H}$  NMR (400 MHz,  $\text{CD}_2\text{Cl}_2$ ):  $\delta$  8.00 (8 H, d,  $J$  = 1.8 Hz, Cz), 7.47 (8 H, dd,  $J$  = 8.6 Hz, 1.8 Hz, Cz), 7.41 (8H, d,  $J$  = 8.6 Hz, Cz), 7.14 (8H, d,  $J$  = 2.2 Hz, Ph), 7.10 (8H, dd,  $J$  = 8.3, 2.2 Hz, Ph), 6.93 (8H, d,  $J$  = 8.3 Hz, Ph), 4.01 (32H, m,  $\text{OCH}_2$ ), 1.81 (32H, m,  $\text{CH}_2$ ), 1.48 (32H, m,  $\text{CH}_2$ ), 1.29 (256H, m, alkyl), 0.88 (48H, m,  $\text{CH}_3$ ).  $^{13}\text{C}$  NMR (100 MHz,  $\text{CD}_2\text{Cl}_2$ ):  $\delta$  150.1, 149.3, 140.6, 138.9, 136.1, 134.6, 125.8, 125.7, 120.1, 119.0, 114.6, 113.6, 110.9, 70.0, 69.9, 32.5, 30.3, 30.3, 30.3, 30.3, 30.1, 30.1, 30.0, 30.0, 26.8, 26.7, 23.3, 14.5. Anal. Calcd for  $\text{C}_{296}\text{H}_{448}\text{N}_6\text{O}_{16}$ : C, 81.8; H, 10.4; N, 1.9; found: C, 81.7; H, 10.7; N, 2.0%. MS (MALDI):  $\text{C}_{296}\text{H}_{449}\text{N}_6\text{O}_{16}$ , 4344.4499, found 4344.4286.

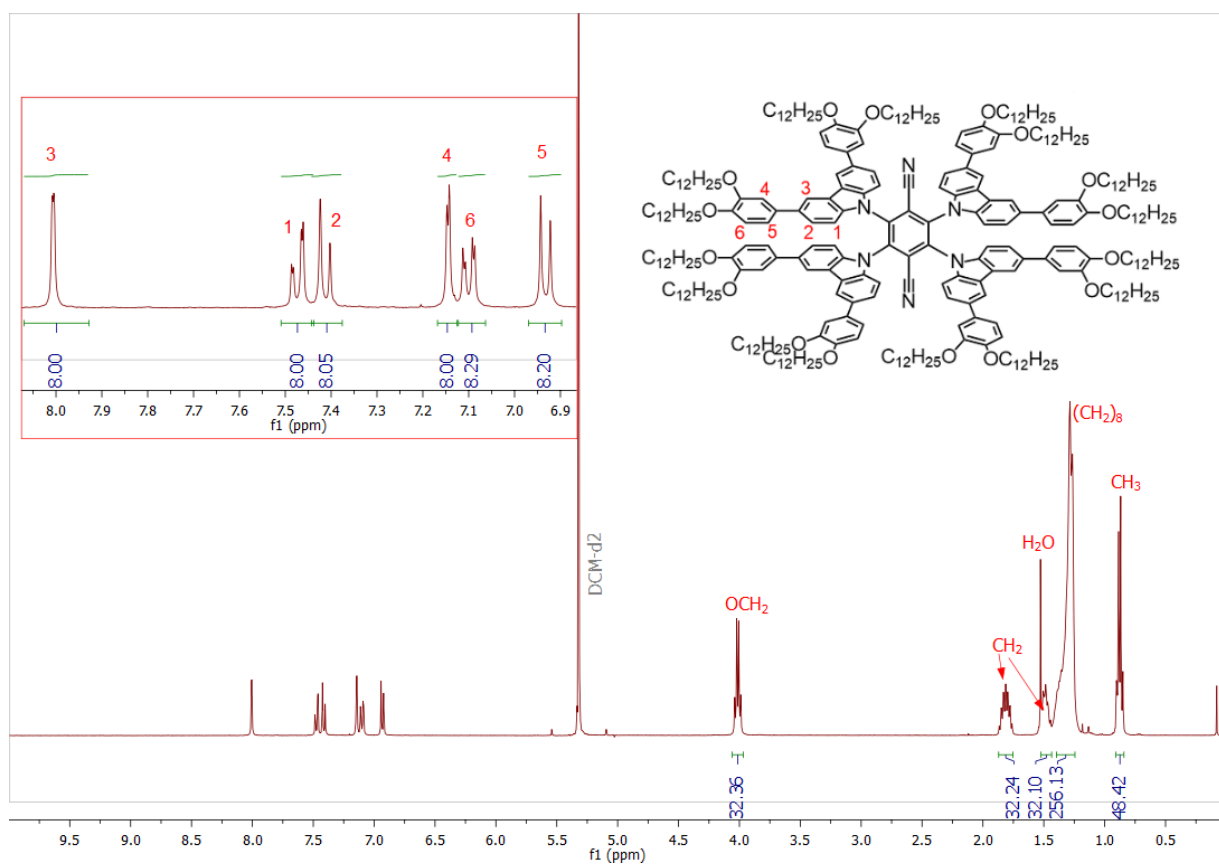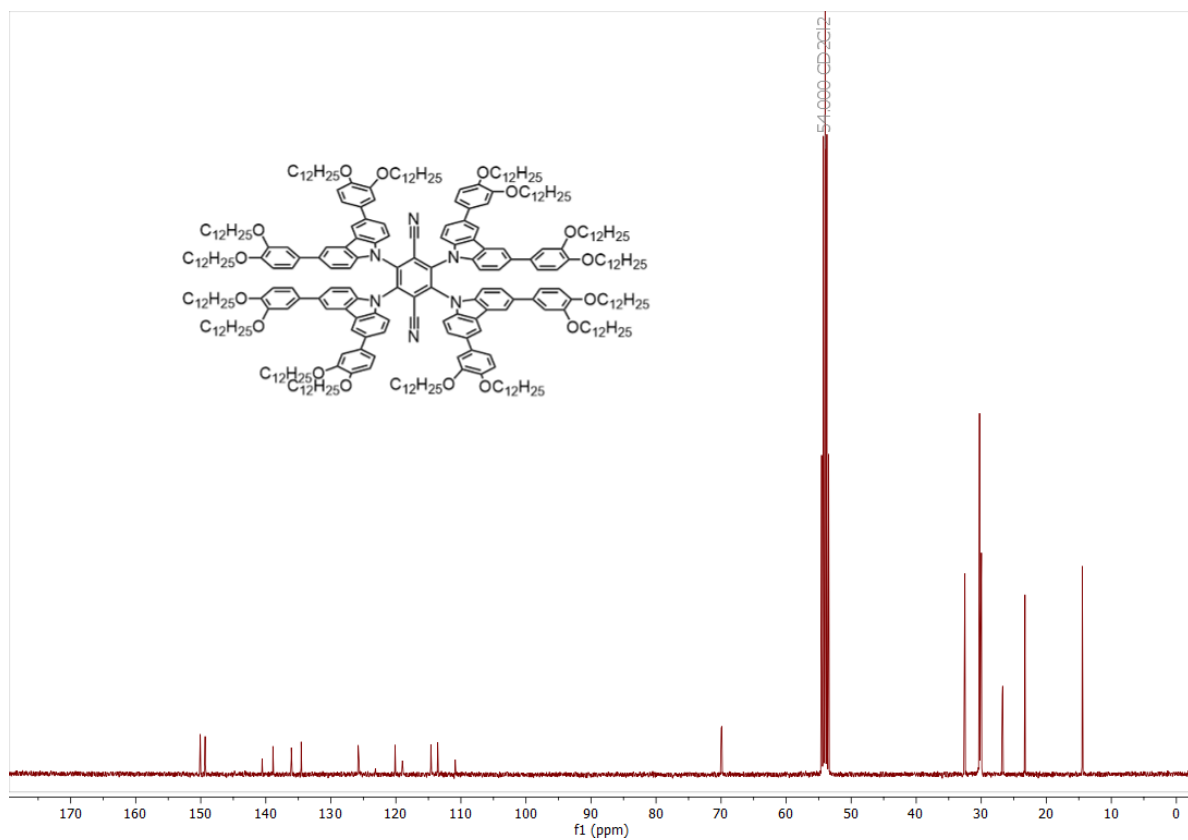

**General procedure. Methoxy analogues of di- and tetrasubstituted terephthalonitriles (3a-Me – 4b-Me)**

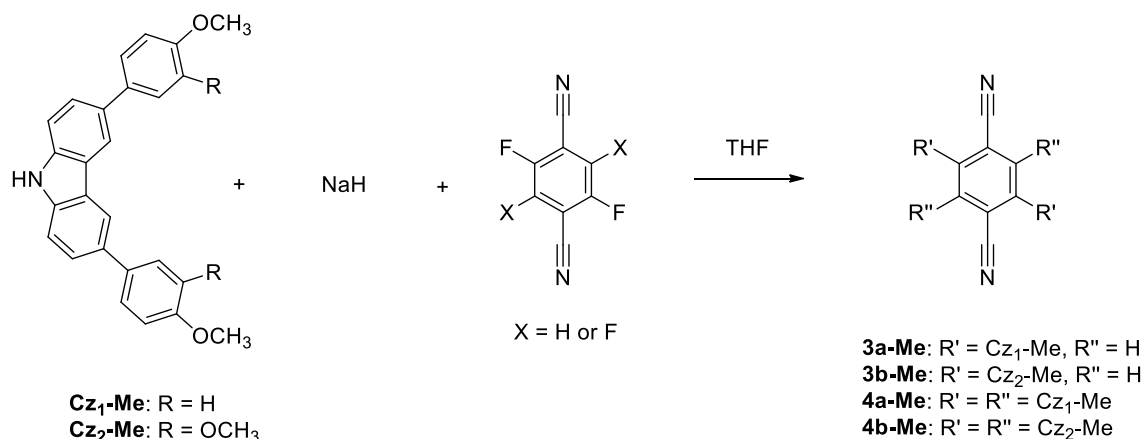

Sodium hydride (60% dispersion in oil) was washed with anhydrous hexane for 15 min. To this white powder, carbazole in extra dry tetrahydrofuran was added. The yellow reaction mixture was stirred for 2 h at 70 °C. Then, terephthalonitrile in dry tetrahydrofuran was added. The reaction mixture was stirred at 75 °C overnight. Water was added to the mixture. The mixture was extracted with dichloromethane, washed with brine and dried over anhydrous MgSO<sub>4</sub>. Solvents were evaporated. A product was purified by column chromatography.

**2,5-Bis-(3,6-di-(4-methoxyphenyl)carbazolyl)-1,4-dicyanobenzene (3a-Me)**

Purified by column chromatography (silica gel, dichloromethane). Yield: 17% (57 mg). <sup>1</sup>H NMR (400 MHz, DMSO-d<sub>6</sub>): δ 8.84 (2H, s, TPN), 8.72 (4 H, d, *J* = 1.8 Hz, Cz), 7.82 (4H, dd, *J* = 8.6, 1.8 Hz, Cz), 7.81 (8H, d, *J* = 8.8 Hz, Ph), 7.73 (4H, d, *J* = 8.6 Hz, Cz), 7.10 (8H, d, *J* = 8.8 Hz, Ph), 3.84 (12H, s, OCH<sub>3</sub>). <sup>13</sup>C NMR (100 MHz, DMSO-d<sub>6</sub>): δ 158.7, 140.0, 139.5, 136.4, 133.5, 133.1, 128.0, 125.2, 124.2, 118.7, 117.9, 114.9, 114.5, 111.1, 55.3.

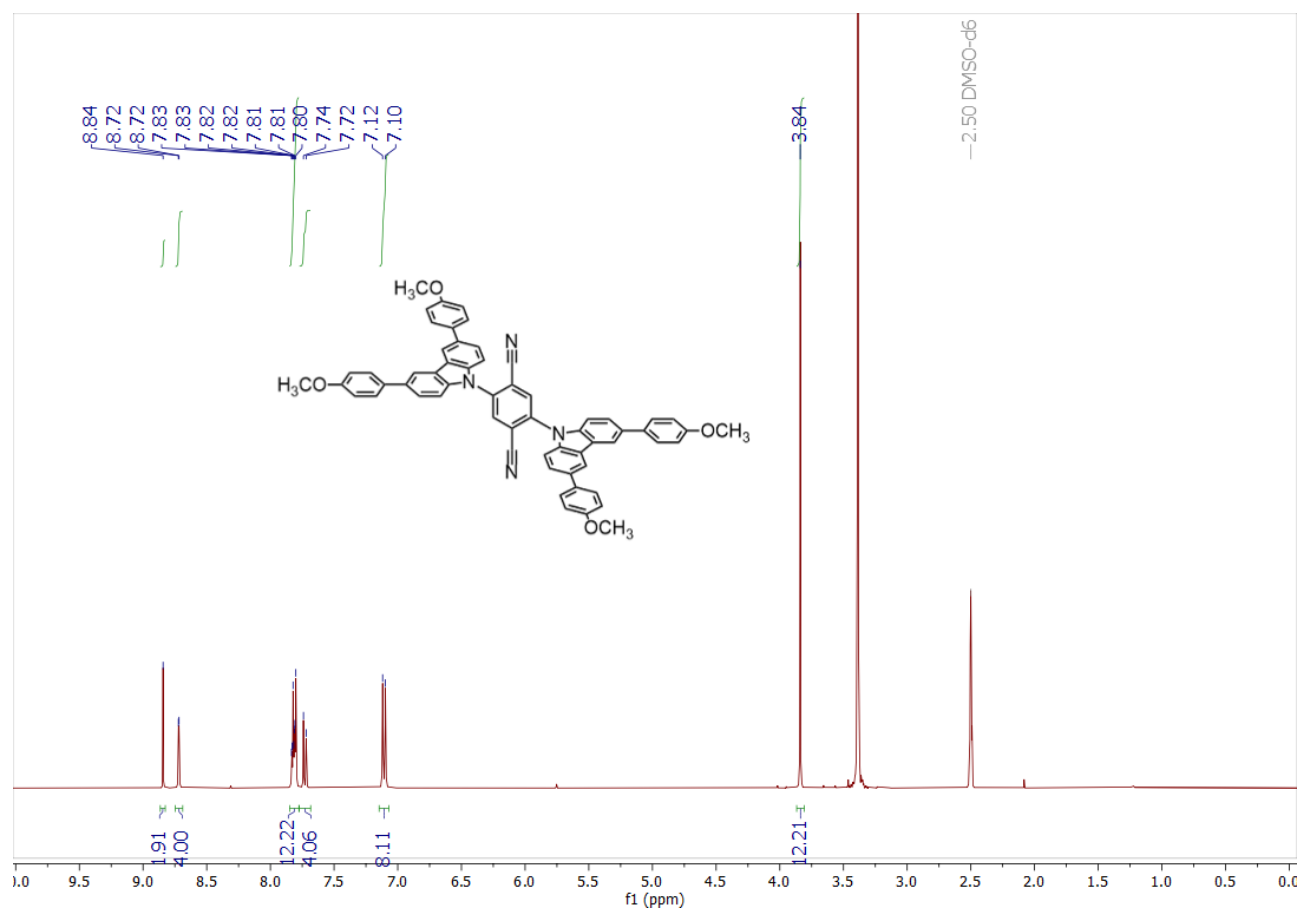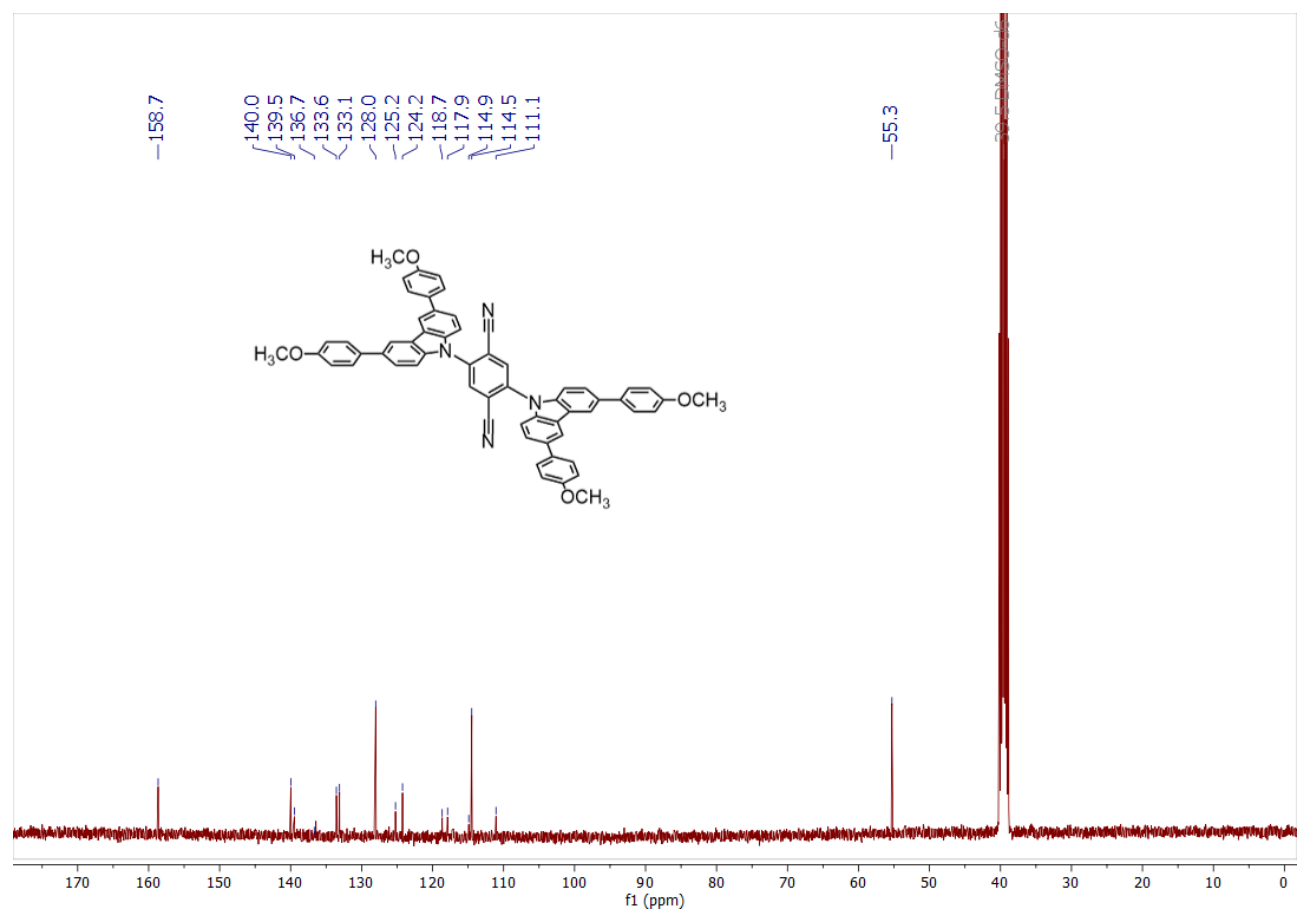

### 2,5-Bis-(3,6-di-(3,4-dimethoxyphenyl)carbazolyl)-1,4-dicyanobenzene (3b-Me)

Purified by column chromatography (silica gel, dichloromethane/ethyl acetate). Yield: 28 % (105 mg).  $^1\text{H}$  NMR (400 MHz,  $\text{DMSO-d}_6$ ):  $\delta$  8.85 (2H, s, TPN), 8.72 (4 H, d,  $J = 1.8$  Hz, Cz), 7.84 (4H, dd,  $J = 8.6, 1.8$  Hz, Cz), 7.72 (4H, d,  $J = 8.6$  Hz, Cz), 7.42 (4 H, d,  $J = 2.2$  Hz, Ph), 7.38 (8H, dd,  $J = 8.3, 2.2$  Hz, Ph), 7.11 (4H, d,  $J = 8.3$  Hz, Ph), 3.93 (12H, s,  $\text{OCH}_3$ ), 3.83 (12H, s,  $\text{OCH}_3$ ).  $^{13}\text{C}$  NMR (100 MHz,  $\text{DMSO-d}_6$ ):  $\delta$  149.2, 148.3, 140.0, 139.5, 136.4, 133.9, 133.5, 125.5, 124.2, 119.1, 118.9, 117.9, 114.9, 112.3, 111.0, 110.9, 55.8, 55.7.

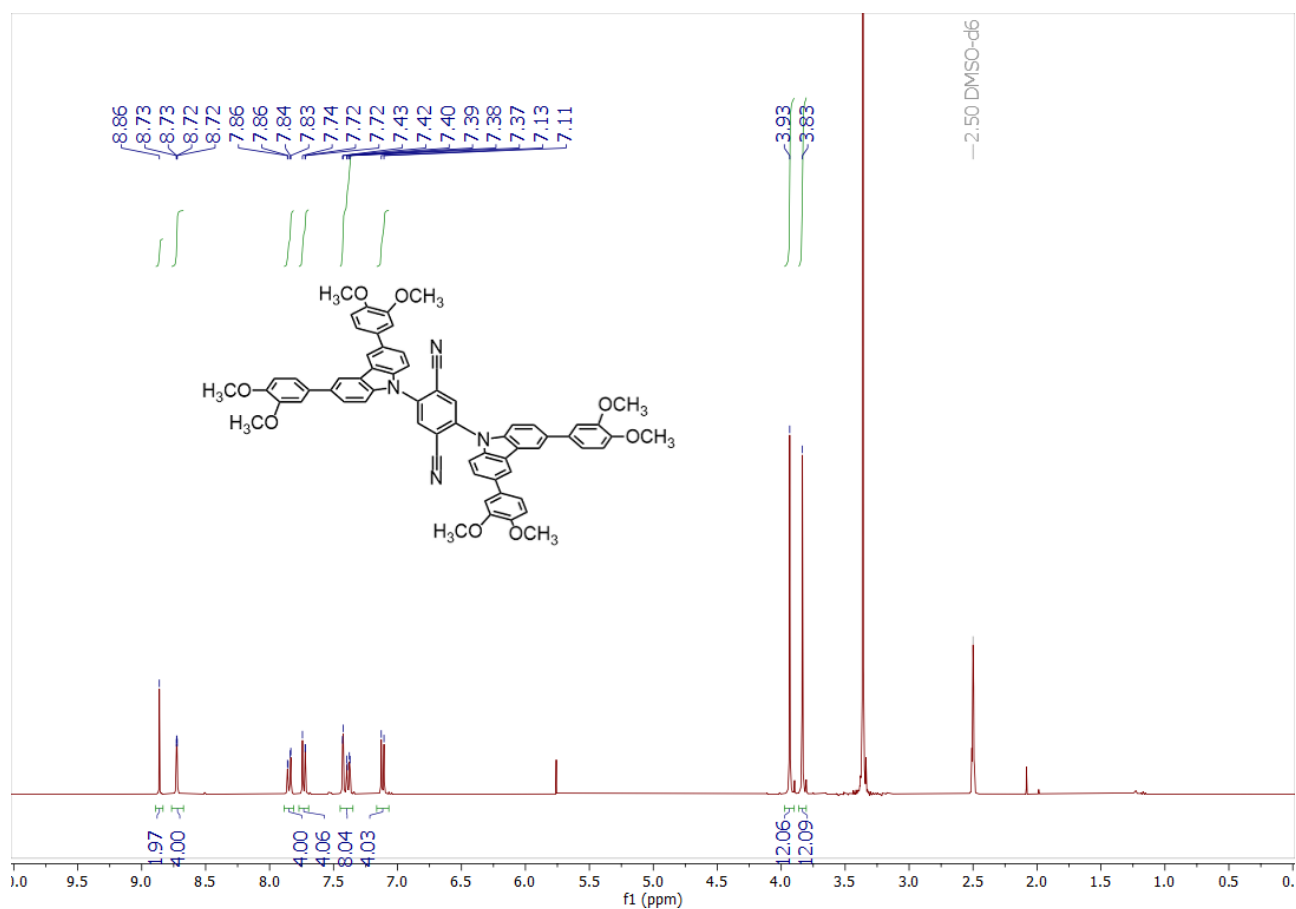



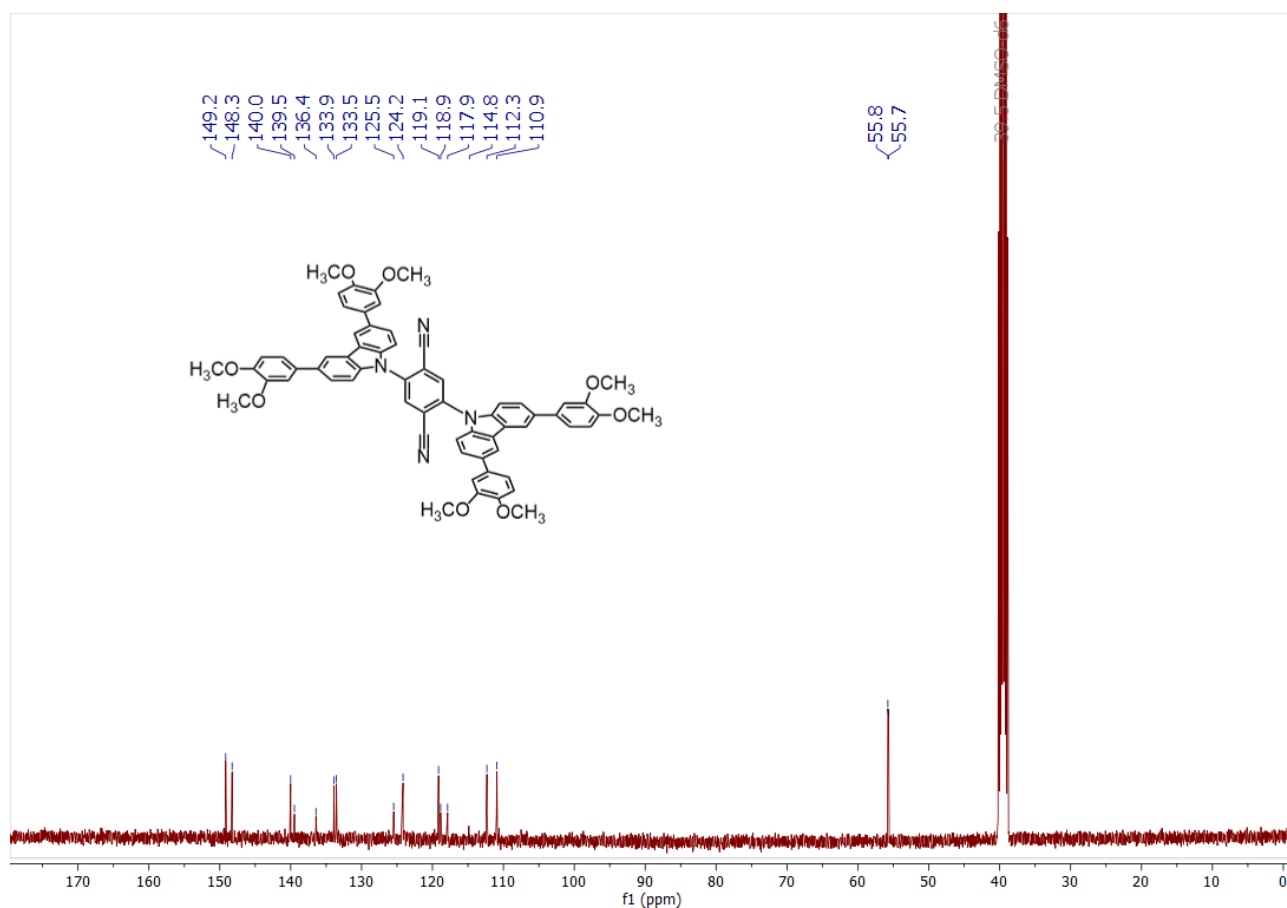

### 2,3,5,6-Tetra(3,6-di-(4-methoxyphenyl)carbazolyl)-1,4-dicyanobenzene (4a-Me)

The precipitate was filtered off and washed with water and a hexane/acetone mixture (9/1). Yield: 55% (144 mg).  $^1\text{H}$  NMR (400 MHz,  $\text{DMSO-d}_6$ ):  $\delta$  7.41 (8H, d,  $J$  = 1.8 Hz, Cz), 7.13 (8H, d,  $J$  = 8.6 Hz, Cz), 6.74 (16 H, d,  $J$  = 8.8 Hz, Ph), 6.68 (8H, dd,  $J$  = 8.6, 1.8 Hz, Cz), 6.11 (16H, d,  $J$  = 8.8 Hz, Ph), 2.91 (24H, s,  $\text{OCH}_3$ ).  $^{13}\text{C}$  NMR (100 MHz,  $\text{DMSO-d}_6$ ):  $\delta$  158.6, 141.2, 139.0, 133.6, 132.9, 127.9, 124.4, 124.3, 122.7, 118.2, 114.3, 111.7, 55.2.

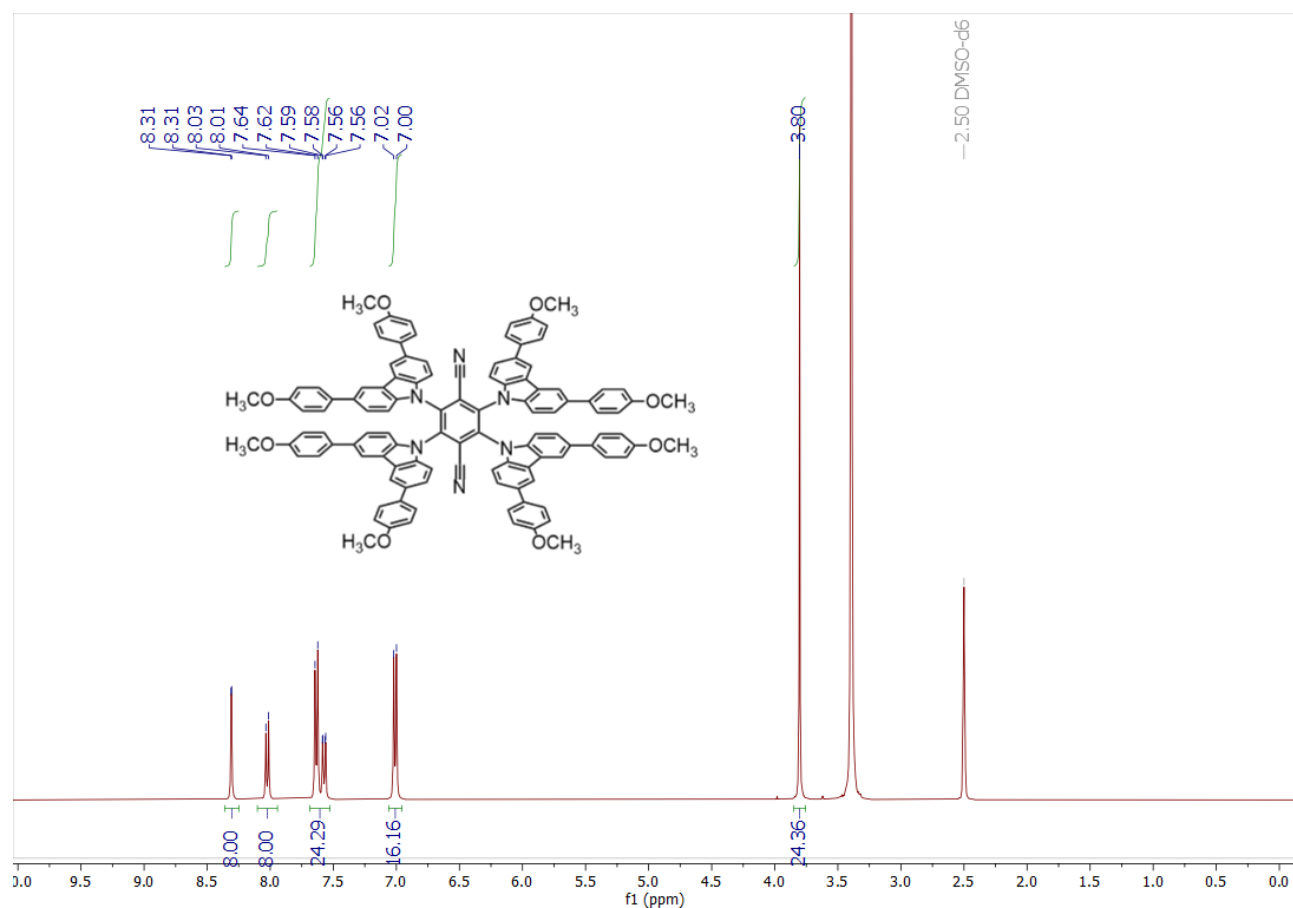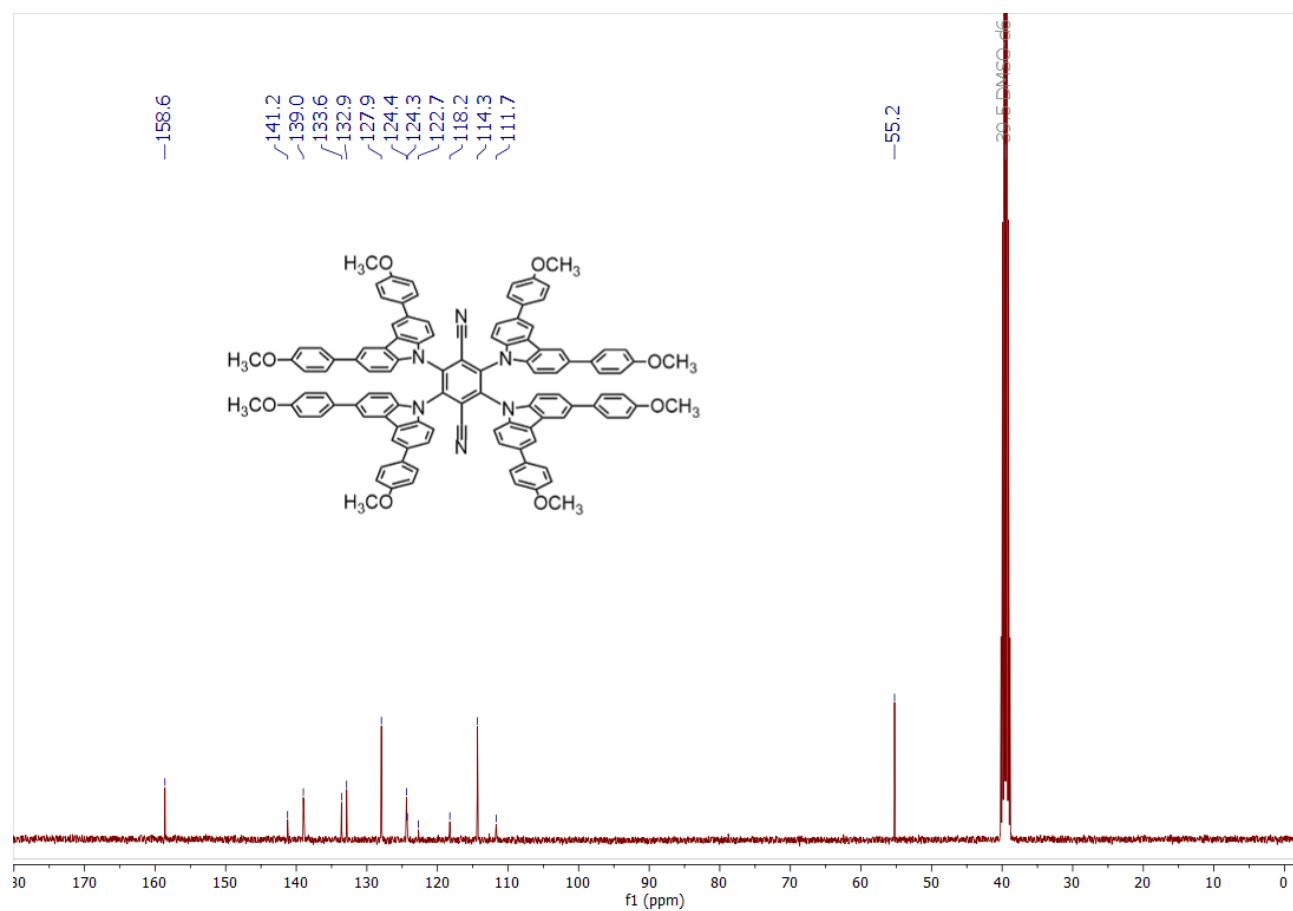

### 2,3,5,6-Tetra(3,6-di-(3,4-dimethoxyphenyl)carbazolyl)-1,4-dicyanobenzene (4b-Me)

The precipitate was filtered off and washed with water and a hexane/acetone mixture (9/1). Yield: 40% (124 mg).  $^1\text{H}$  NMR (400 MHz, DMSO- $d_6$ ):  $\delta$  8.34 (8 H, d,  $J$  = 1.8 Hz, Cz), 8.03 (8H, d,  $J$  = 8.6 Hz, Cz), 7.60 (8H, dd,  $J$  = 8.6, 1.8 Hz, Cz), 7.25 (8H, d,  $J$  = 2.0 Hz, Ph), 7.21 (8H, dd,  $J$  = 8.3, 2.0 Hz, Ph), 7.01 (8H, d,  $J$  = 8.3 Hz, Ph), 3.81 (24H, s, OCH<sub>3</sub>), 3.79 (24H, s, OCH<sub>3</sub>).  $^{13}\text{C}$  NMR (100 MHz, DMSO- $d_6$ ):  $\delta$  149.1, 148.3, 141.1, 139.0, 134.0, 133.3, 124.6, 124.4, 119.1, 118.5, 112.2, 111.6, 110.8, 55.7.

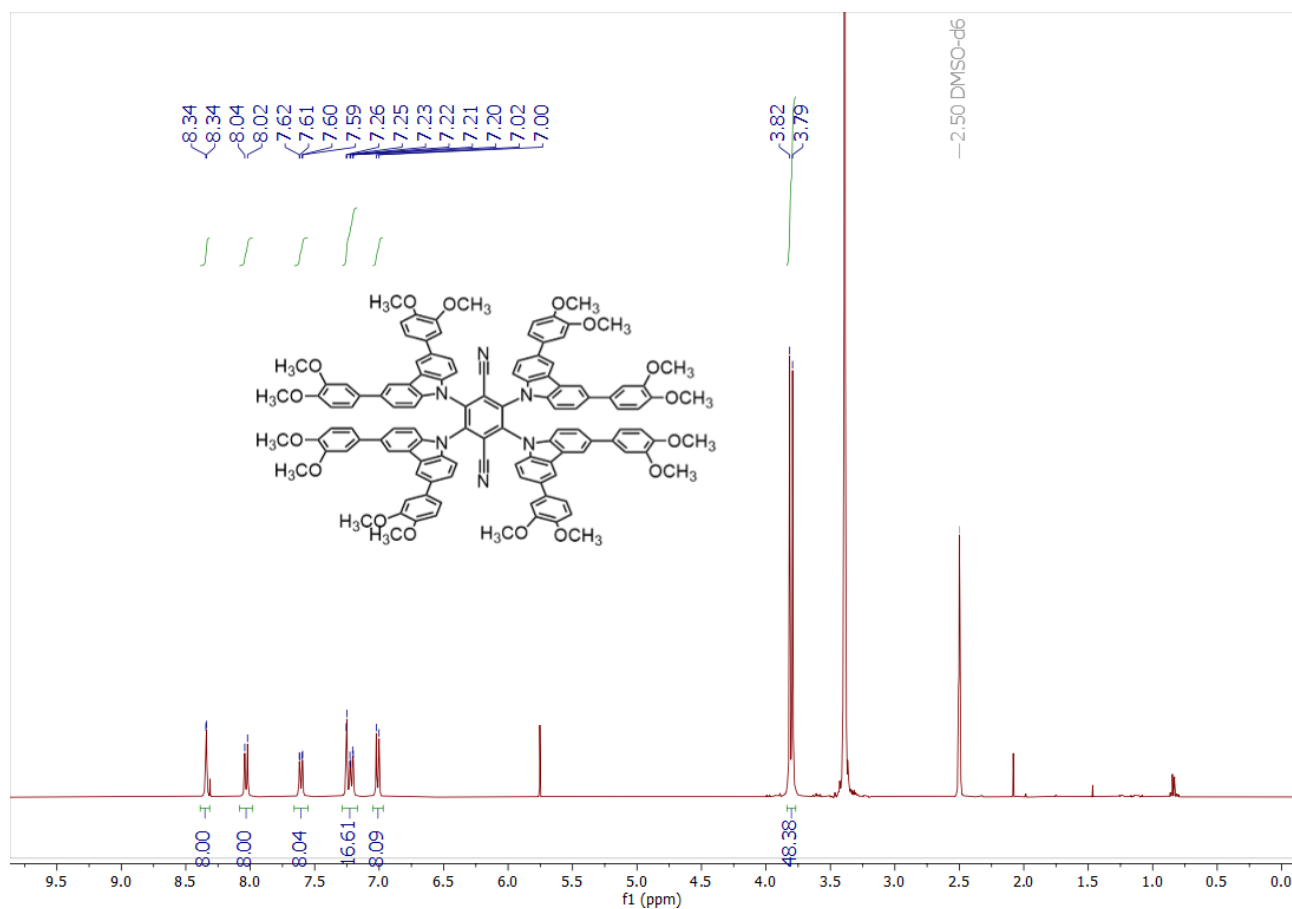

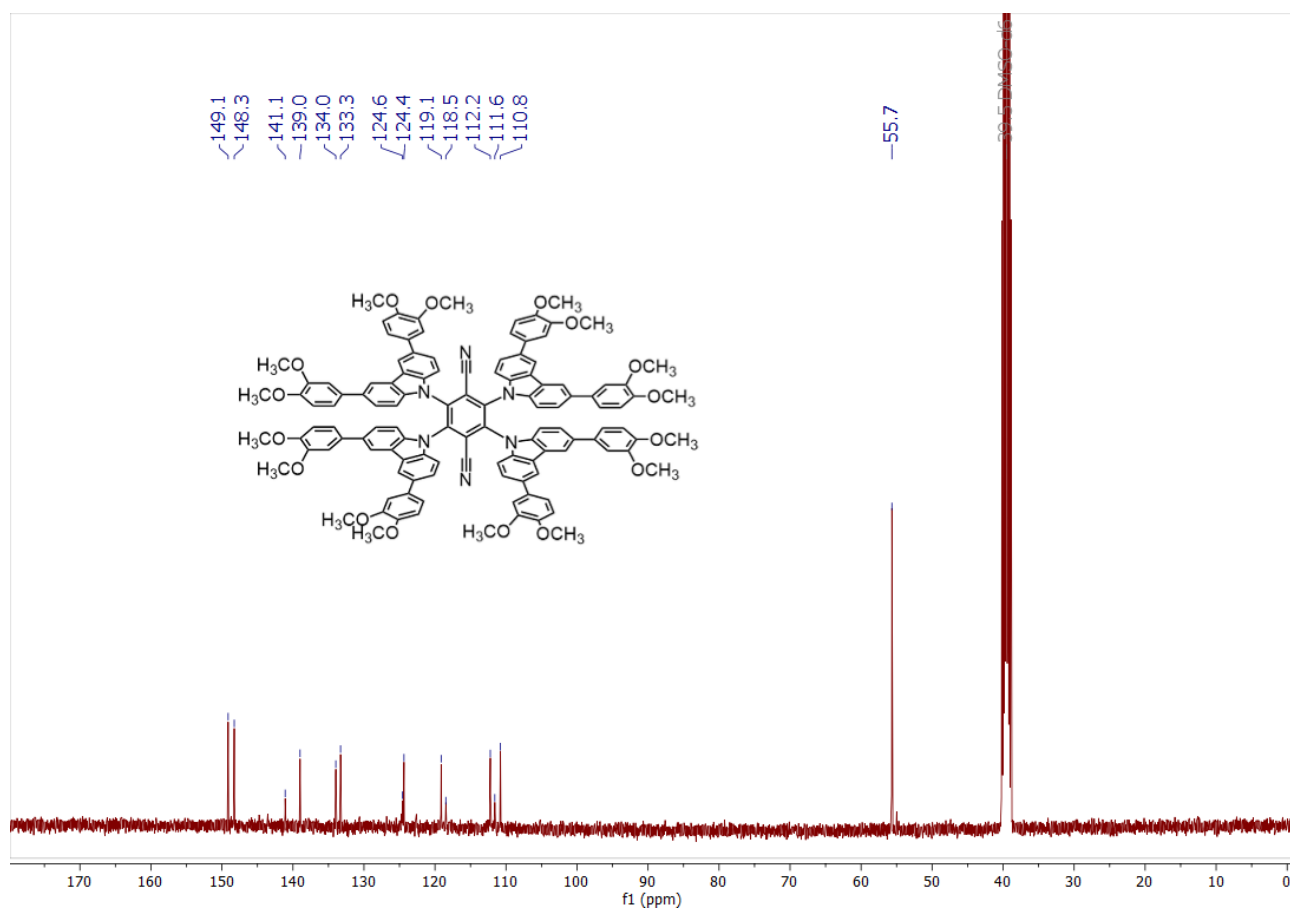

## X-ray Crystallographic Analyses

**Table S1** Crystal data and structure refinement for Compounds **3b-Me** and **4b-Me**

|                                                              | <b>3b-Me</b>                                                                                | <b>4b-Me</b>                                                     |
|--------------------------------------------------------------|---------------------------------------------------------------------------------------------|------------------------------------------------------------------|
| CCDC Number                                                  | 2056911                                                                                     | 2056912                                                          |
| Empirical formula                                            | C <sub>123.31</sub> H <sub>99.31</sub> Cl <sub>9.94</sub> N <sub>6</sub> O <sub>16.24</sub> | C <sub>68</sub> H <sub>56</sub> N <sub>6</sub> O <sub>8</sub>    |
| Formula weight                                               | 2277.32                                                                                     | 1085.18                                                          |
| Temperature/K                                                | 110.00(10)                                                                                  | 110.00(10)                                                       |
| Crystal system                                               | triclinic                                                                                   | triclinic                                                        |
| Space group                                                  | P-1                                                                                         | P-1                                                              |
| <i>a</i> /Å                                                  | 11.3160(7)                                                                                  | 8.7095(6)                                                        |
| <i>b</i> /Å                                                  | 15.6983(10)                                                                                 | 12.8934(10)                                                      |
| <i>c</i> /Å                                                  | 16.1277(11)                                                                                 | 14.2434(10)                                                      |
| $\alpha$ /°                                                  | 73.671(6)                                                                                   | 101.702(6)                                                       |
| $\beta$ /°                                                   | 86.678(5)                                                                                   | 105.271(6)                                                       |
| $\gamma$ /°                                                  | 81.686(5)                                                                                   | 108.031(7)                                                       |
| Volume/Å <sup>3</sup>                                        | 2720.0(3)                                                                                   | 1394.93(19)                                                      |
| <i>Z</i>                                                     | 1                                                                                           | 1                                                                |
| $\rho_{\text{calc}}$ g/cm <sup>3</sup>                       | 1.390                                                                                       | 1.292                                                            |
| $\mu$ /mm <sup>-1</sup>                                      | 2.910                                                                                       | 0.690                                                            |
| <i>F</i> (000)                                               | 1180.0                                                                                      | 570.0                                                            |
| Crystal size/mm <sup>3</sup>                                 | 0.144 × 0.091 × 0.01                                                                        | 0.245 × 0.062 × 0.03                                             |
| Radiation                                                    | CuK $\alpha$ ( $\lambda$ = 1.54184)                                                         | Cu K $\alpha$ ( $\lambda$ = 1.54184)                             |
| 2 $\theta$ range for data collection/°                       | 7 to 134.158                                                                                | 6.766 to 134.136                                                 |
| Index ranges                                                 | -13 ≤ <i>h</i> ≤ 12, -18 ≤ <i>k</i> ≤ 16,                                                   | -10 ≤ <i>h</i> ≤ 10, -15 ≤ <i>k</i> ≤ 15,                        |
| Reflections collected                                        | 16956                                                                                       | 8913                                                             |
| Independent reflections                                      | 9662 [ <i>R</i> <sub>int</sub> = 0.0504,                                                    | 4977 [ <i>R</i> <sub>int</sub> = 0.0273,                         |
| Data/restraints/parameters                                   | 9662/33/797                                                                                 | 4977/3/468                                                       |
| Goodness-of-fit on <i>F</i> <sup>2</sup>                     | 1.012                                                                                       | 1.028                                                            |
| Final <i>R</i> indexes [ <i>I</i> ≥ 2 $\sigma$ ( <i>I</i> )] | <i>R</i> <sub>1</sub> = 0.0568, w <i>R</i> <sub>2</sub> = 0.1373                            | <i>R</i> <sub>1</sub> = 0.0431, w <i>R</i> <sub>2</sub> = 0.1034 |
| Final <i>R</i> indexes [all data]                            | <i>R</i> <sub>1</sub> = 0.0876, w <i>R</i> <sub>2</sub> = 0.1600                            | <i>R</i> <sub>1</sub> = 0.0612, w <i>R</i> <sub>2</sub> = 0.1144 |
| Largest diff. peak/hole/e Å <sup>-3</sup>                    | 0.37/-0.42                                                                                  | 0.38/-0.19                                                       |

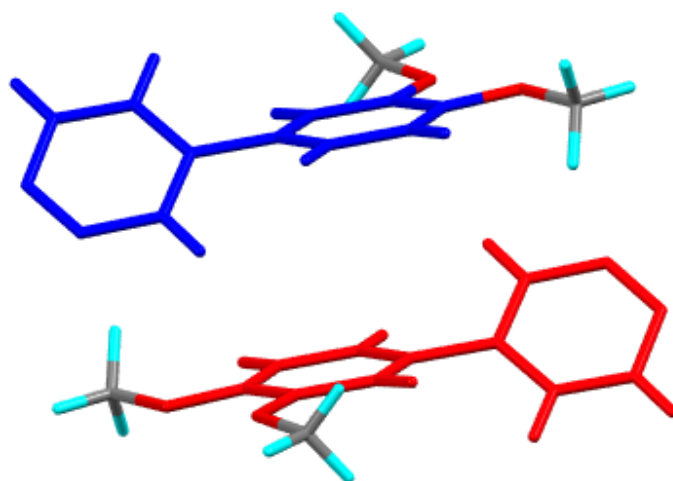

Figure S1 Figure showing the intermolecular disposition of dimethoxyphenyl units – separation between the rings is 3.985 Å.

## Liquid Crystal Data

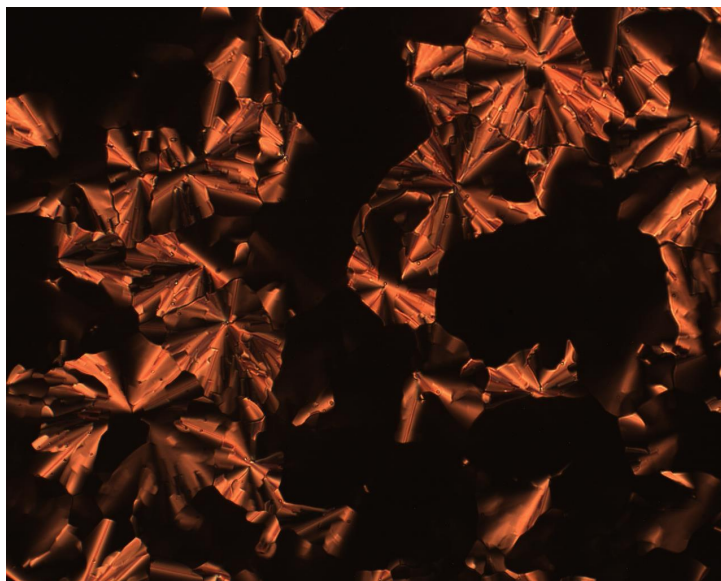

Figure S2 Col<sub>h</sub> phase of a mixture of **3b** and **4b** at 150 °C on cooling from the isotropic phase in which the compounds were mixed.

## Photophysical Data

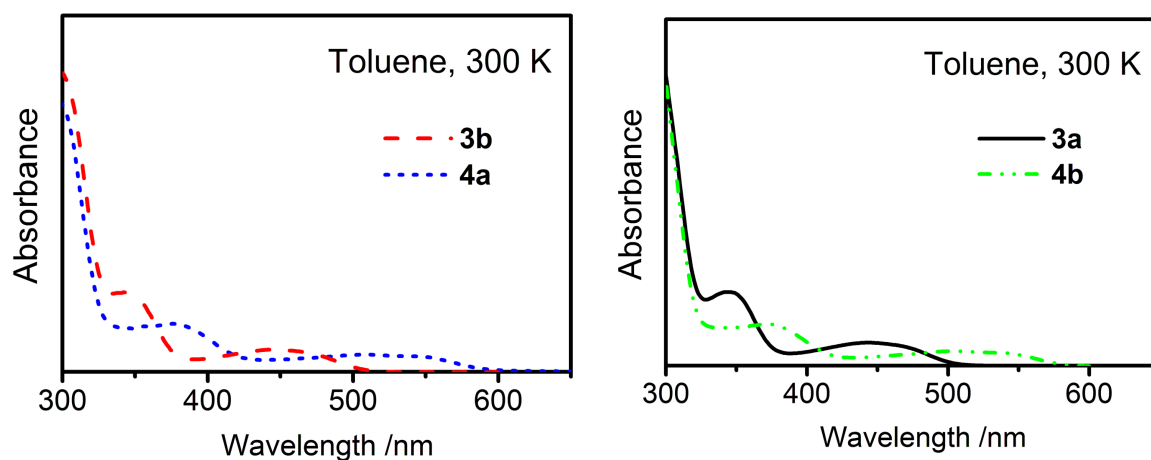

**Figure S3.** UV-Vis absorption spectra of compounds **3a**, **3b**, **4a** and **4b** in toluene.

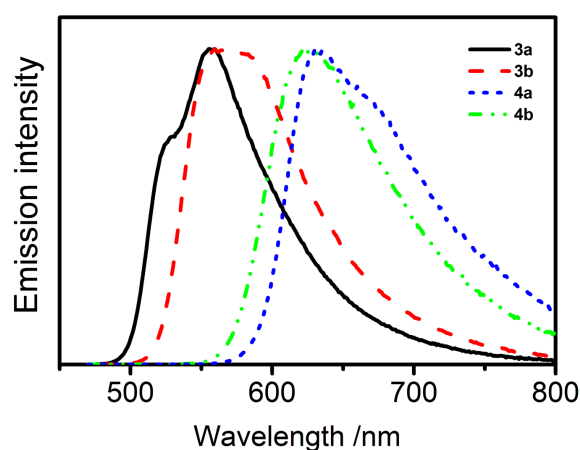

**Figure S4** Luminescence spectra of solid samples of compounds **3a**, **3b**, **4a**, and **4b** at ambient temperature. Spectral forms of the recorded emission bands suggest significant inhomogeneity of the samples.

Table S2 Luminescence properties of compounds **3a**, **3b**, **4a**, and **4b** determined for solid samples at ambient temperature

|           | $\lambda_{\text{max}} / \text{nm}$ | $\tau / \text{ns}$<br>Prompt flu. | $\tau / \mu\text{s}$<br>Delayed em. | $\phi_{\text{PL}} / \%$ | $k_r / \text{s}^{-1}$ | $k_{\text{nr}} / \text{s}^{-1}$ |
|-----------|------------------------------------|-----------------------------------|-------------------------------------|-------------------------|-----------------------|---------------------------------|
| <b>3a</b> | 554                                | 13                                | 27 (5% int) <sup>a</sup>            | 30 (27)                 | $2.3 \times 10^7$     | $5.3 \times 10^7$               |
| <b>3b</b> | 560                                | 10.7                              | 18 (10% int) <sup>a</sup>           | 20 (18)                 | $1.7 \times 10^7$     | $8.2 \times 10^7$               |
| <b>4a</b> | 625                                | 3.6                               | 1.1                                 | 11                      | $3.1 \times 10^7$     | $25 \times 10^7$                |
| <b>4b</b> | 635                                | 3.9                               | $\leq 1$                            | 4                       | $1.0 \times 10^7$     | $25 \times 10^7$                |

<sup>a</sup> 'int' refers to the % emission intensity arising from the longer-lived emission.

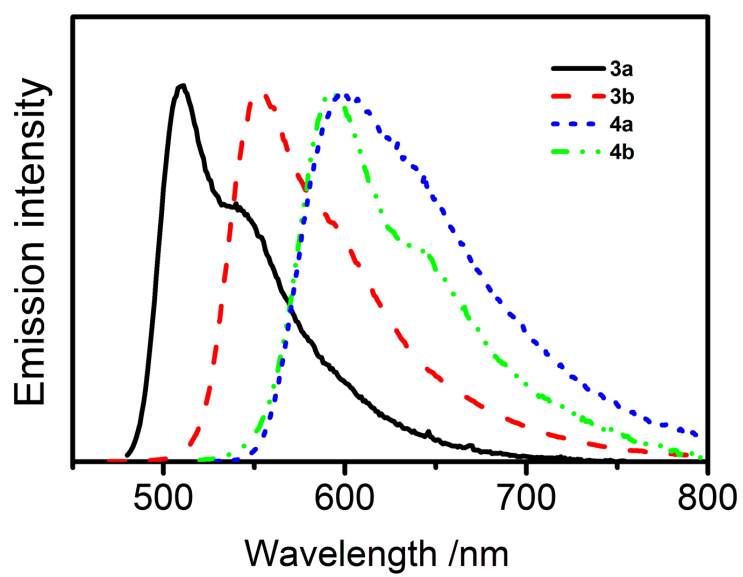

**Figure S5.** Luminescence spectra of compounds **3a**, **3b**, **4a**, and **4b** recorded in frozen toluene glass at 77K.



Table S2. Luminescence properties of compounds **3a**, **3b**, **4a**, and **4b** determined in toluene at 77 K

|           | $\lambda_{\text{max}}/\text{nm}$ | $\tau/\text{ns}$<br>Prompt flu. | $\tau/\mu\text{s}$<br>Delayed em. | $\phi_{\text{PL}}/\%$ | $k_r/\text{s}^{-1}$ | $k_{\text{nr}}/\text{s}^{-1}$ |
|-----------|----------------------------------|---------------------------------|-----------------------------------|-----------------------|---------------------|-------------------------------|
| <b>3a</b> | 509                              | 17                              | –                                 | 92                    | $5.4 \times 10^7$   | $0.5 \times 10^7$             |
| <b>3b</b> | 554                              | 12                              | –                                 | 25                    | $2.1 \times 10^7$   | $6.3 \times 10^7$             |
| <b>4a</b> | 593                              | 10.4                            | –                                 | 52                    | $5.0 \times 10^7$   | $4.6 \times 10^7$             |
| <b>4b</b> | 601                              | 7.7                             | –                                 | 17                    | $2.2 \times 10^7$   | $11 \times 10^7$              |

## Theoretical data

**Table S3.** DFT calculated frontier orbital energies and partial contributions of **3b-Me** in the state  $T_1$  geometry resulting from Mulliken population analysis.

| Orbitals      | Energy, eV | Contributions, %   |                                      |
|---------------|------------|--------------------|--------------------------------------|
|               |            | Terephthalonitrile | Methoxyphenyl substituted carbazoles |
| <b>LUMO+4</b> | -1.765     | 1                  | 99                                   |
| <b>LUMO+3</b> | -2.145     | 2                  | 98                                   |
| <b>LUMO+2</b> | -2.156     | 2                  | 98                                   |
| <b>LUMO+1</b> | -2.632     | 85                 | 15                                   |
| <b>LUMO</b>   | -3.967     | 95                 | 5                                    |
| <b>HOMO</b>   | -5.077     | 2                  | 98                                   |
| <b>HOMO-1</b> | -5.149     | 3                  | 97                                   |
| <b>HOMO-2</b> | -5.303     | 0                  | 100                                  |
| <b>HOMO-3</b> | -5.311     | 0                  | 100                                  |
| <b>HOMO-4</b> | -5.904     | 4                  | 96                                   |

**Table S4.** DFT calculated frontier orbital energies and partial contributions of **4a-Me** in the state T<sub>1</sub> geometry resulting from Mulliken population analysis.

| Orbitals      | Energy, eV | Contributions, %   |                                      |
|---------------|------------|--------------------|--------------------------------------|
|               |            | Terephthalonitrile | Methoxyphenyl substituted carbazoles |
| <b>LUMO+4</b> | -1.925     | 0                  | 100                                  |
| <b>LUMO+3</b> | -2.248     | 2                  | 98                                   |
| <b>LUMO+2</b> | -2.285     | 1                  | 99                                   |
| <b>LUMO+1</b> | -2.849     | 78                 | 22                                   |
| <b>LUMO</b>   | -4.027     | 93                 | 7                                    |
| <b>HOMO</b>   | -5.052     | 2                  | 98                                   |
| <b>HOMO-1</b> | -5.140     | 3                  | 97                                   |
| <b>HOMO-2</b> | -5.351     | 2                  | 98                                   |
| <b>HOMO-3</b> | -5.370     | 2                  | 98                                   |
| <b>HOMO-4</b> | -5.388     | 1                  | 99                                   |

**Table S5.** DFT calculated frontier orbital energies and partial contributions of **4b-Me** in the state T<sub>1</sub> geometry resulting from Mulliken population analysis.

| Orbitals | Energy, eV | Contributions, %   |                                      |
|----------|------------|--------------------|--------------------------------------|
|          |            | Terephthalonitrile | Methoxyphenyl substituted carbazoles |
| LUMO+4   | -1.816     | 1                  | 99                                   |
| LUMO+3   | -2.288     | 3                  | 97                                   |
| LUMO+2   | -2.319     | 1                  | 99                                   |
| LUMO+1   | -2.892     | 79                 | 21                                   |
| LUMO     | -4.027     | 93                 | 7                                    |
| HOMO     | -4.903     | 2                  | 98                                   |
| HOMO-1   | -4.959     | 2                  | 98                                   |
| HOMO-2   | -5.107     | 0                  | 100                                  |
| HOMO-3   | -5.123     | 0                  | 100                                  |
| HOMO-4   | -5.170     | 1                  | 99                                   |

**Table S6.** TD-DFT calculated lowest triplet and singlet states of **Irlr'** in the  $T_1$  state geometry.

| State,<br>energy<br>(eV) | $f$<br>(oscillator<br>strength) | Contributing transition<br>coefficients* | Character**                                                                        |
|--------------------------|---------------------------------|------------------------------------------|------------------------------------------------------------------------------------|
| <i>triplets</i>          |                                 |                                          |                                                                                    |
| $T_1$ ,<br>1.514         | (triplet)                       | HOMO→LUMO (0.70)                         | $LC^{CN-CN} / M^{Ir1/Ir2} L^{CN-CN} CT$                                            |
| $T_2$ ,<br>2.124         | (triplet)                       | HOMO–2→LUMO (0.70)                       | $M^{Ir1/Ir2} L^{CN-CN} CT / L^{Cl1/Cl2} L^{CN-CN} CT / LC^{CN-CN}$                 |
| $T_3$ ,<br>2.140         | (triplet)                       | HOMO–1→LUMO (0.70)                       | $M^{Ir1/Ir2} L^{CN-CN} CT / L^{Cl1/Cl2} L^{CN-CN} CT / L^{NCN1/NCN2} L^{CN-CN} CT$ |
| $T_4$ ,<br>2.182         | (triplet)                       | HOMO–3→LUMO (0.70)                       | $LC^{CN-CN} / M^{Ir1/Ir2} L^{CN-CN} CT / L^{Cl1/Cl2} L^{CN-CN} CT$                 |
| $T_5$ ,<br>2.344         | (triplet)                       | HOMO→LUMO+1 (0.70)                       | $L^{CN-CN} L^{NCN1/NCN2} CT$                                                       |
| <i>singlets</i>          |                                 |                                          |                                                                                    |
| $S_1$ ,<br>2.048         | 0.2915                          | HOMO→LUMO (0.68)<br>HOMO–4→LUMO (-0.15)  | $LC^{CN-CN} / M^{Ir1/Ir2} L^{CN-CN} CT$                                            |
| $S_2$ ,<br>2.153         | 0.0000                          | HOMO–1→LUMO (0.70)                       | $M^{Ir1/Ir2} L^{CN-CN} CT / L^{Cl1/Cl2} L^{CN-CN} CT / L^{NCN1/NCN2} L^{CN-CN} CT$ |
| $S_3$ ,<br>2.194         | 0.0012                          | HOMO–3→LUMO (0.71)                       | $LC^{CN-CN} / M^{Ir1/Ir2} L^{CN-CN} CT / L^{Cl1/Cl2} L^{CN-CN} CT$                 |
| $S_4$ ,<br>2.252         | 0.0000                          | HOMO–2→LUMO (0.70)                       | $M^{Ir1/Ir2} L^{CN-CN} CT / L^{Cl1/Cl2} L^{CN-CN} CT / LC^{CN-CN}$                 |
| $S_5$ ,<br>2.359         | 0.0184                          | HOMO→LUMO+1 (0.71)                       | $L^{CN-CN} L^{NCN1/NCN2} CT$                                                       |

\*Square of the coefficient multiplied by two gives percentage contribution of the transition to formation of the excited state.

\*\*MLCT – Metal (M) to Ligand (L) Charge Transfer. LC-Ligand Centred. LLCT – Ligand-to-Ligand Charge Transfer.

## References

1. Frisch, M. J.; Trucks, G. W.; Schlegel, H. B.; Scuseria, G. E.; Robb, M. A.; Cheeseman, J. R.; Scalmani, G.; Barone, V.; Mennucci, B.; Petersson, G. A.; Nakatsuji, H.; Caricato, M.; Li, X.; Hratchian, H. P.; Izmaylov, A. F.; Bloino, J.; Zheng, G.; Sonnenberg, J. L.; Hada, M.; Ehara, M.; Toyota, K.; Fukuda, R.; Hasegawa, J.; Ishida, M.; Nakajima, T.; Honda, Y.; Kitao, O.; Nakai, H.; Vreven, T.; Montgomery Jr., J. A.; Peralta, J. E.; Ogliaro, F.; Bearpark, M. J.; Heyd, J.; Brothers, E. N.; Kudin, K. N.; Staroverov, V. N.; Kobayashi, R.; Normand, J.; Raghavachari, K.; Rendell, A. P.; Burant, J. C.; Iyengar, S. S.; Tomasi, J.; Cossi, M.; Rega, N.; Millam, N. J.; Klene, M.; Knox, J. E.; Cross, J. B.; Bakken, V.; Adamo, C.; Jaramillo, J.; Gomperts, R.; Stratmann, R. E.; Yazyev, O.; Austin, A. J.; Cammi, R.; Pomelli, C.; Ochterski, J. W.; Martin, R. L.; Morokuma, K.; Zakrzewski, V. G.; Voth, G. A.; Salvador, P.; Dannenberg, J. J.; Dapprich, S.; Daniels, A. D.; Farkas, Ö.; Foresman, J. B.; Ortiz, J. V.; Cioslowski, J.; Fox, D. J., *Gaussian 09*. Gaussian, Inc.: Wallingford, CT, USA, 2009.
2. Peverati, R.; Truhlar, D. G., M11-L: A Local Density Functional That Provides Improved Accuracy for Electronic Structure Calculations in Chemistry and Physics. *J. Phys. Chem. Lett.* **2012**, *3*, 117-124.
3. Weigend, F.; Ahlrichs, R., Balanced basis sets of split valence, triple zeta valence and quadruple zeta valence quality for H to Rn: Design and assessment of accuracy. *Phys. Chem. Chem. Phys.* **2005**, *7*, 3297-3305.
